# Supplementary material for: Experiences and meanings of integration of TCAM (Traditional, Complementary and Alternative Medical) providers in three Indian states: results from a cross-sectional, qualitative implementation research study
Source: PubMed Central journal article supplement (PMC4248091; doi:10.1136/bmjopen-2014-005203), 2014-11-25
Supplement: bmjopen-2014-005203.draft_revisions.pdf [file bmjopen-2014-005203.draft_revisions.pdf]

# BMJ Open

## Experiences and meanings of integration of TCAM (Traditional, Complementary and Alternative Medical) providers in three Indian states: Results from a cross- sectional, qualitative implementation research study

|                                 |                                                                                                                                                                                                                                                                                                                                                                                                                                       |
|---------------------------------|---------------------------------------------------------------------------------------------------------------------------------------------------------------------------------------------------------------------------------------------------------------------------------------------------------------------------------------------------------------------------------------------------------------------------------------|
| Journal:                        | <i>BMJ Open</i>                                                                                                                                                                                                                                                                                                                                                                                                                       |
| Manuscript ID:                  | bmjopen-2014-005203                                                                                                                                                                                                                                                                                                                                                                                                                   |
| Article Type:                   | Research                                                                                                                                                                                                                                                                                                                                                                                                                              |
| Date Submitted by the Author:   | 07-Mar-2014                                                                                                                                                                                                                                                                                                                                                                                                                           |
| Complete List of Authors:       | Nambiar, Devaki; Public Health Foundation of India, Narayan, Venkatesh; All India Institute of Medical Sciences, Lakshmi, JK; Indian Institute of Public Health - Hyderabad, Porter, John; London School of Hygiene & Tropical Medicine, Department of Clinical Research<br>Sathyanarayana, TN; Indian Institute of Public Health-Bangalore Campus, Health Policy and Management<br>Sheikh, Kabir; Public Health Foundation of India, |
| <b>Primary Subject Heading</b>: | Health services research                                                                                                                                                                                                                                                                                                                                                                                                              |
| Secondary Subject Heading:      | Global health, Qualitative research                                                                                                                                                                                                                                                                                                                                                                                                   |
| Keywords:                       | COMPLEMENTARY MEDICINE, International health services < HEALTH SERVICES ADMINISTRATION & MANAGEMENT, QUALITATIVE RESEARCH                                                                                                                                                                                                                                                                                                             |
|                                 |                                                                                                                                                                                                                                                                                                                                                                                                                                       |

SCHOLARONE™  
Manuscripts

only

“Little somethings,” but “nothing as such”

Running Head: “Little somethings,” but “nothing as such”

Title: Experiences and meanings of integration of TCAM (Traditional, Complementary and Alternative Medical) providers in three Indian states: Results from a cross-sectional, qualitative implementation research study

Authors: D Nambiar,<sup>1</sup> VV Narayan,<sup>2</sup> JK Lakshmi,<sup>3</sup> J Porter,<sup>4</sup> TN Sathyanarayana,<sup>5</sup> K Sheikh<sup>4</sup>

1 Public Health Foundation of India, New Delhi, India

2 All India Institute of Medical Sciences, New Delhi, India

3 Indian Institute of Public Health, Hyderabad, India

4 London School of Hygiene and Tropical Medicine, London, United Kingdom

5 Indian Institute of Public Health, Bangalore, India

Corresponding Author Information:

Devaki Nambiar, PhD

Research Scientist

Public Health Foundation of India

ISID, 4 Institutional Area

Vasant Kunj 110067

Keywords: Alternative Medicine, Qualitative Evaluation, World Health

Word Count: 3,075

“Little somethings,” but “nothing as such”

## Abstract

Objectives: Efforts to engage Traditional Complementary and Alternative Medical (TCAM) practitioners in the public health workforce have growing relevance for India’s path to universal health coverage. We used an action-centred framework to understand how policy prescriptions related to integration were being implemented in three distinct Indian states.

Setting: Health departments and district-level primary care facilities in the states of Kerala, Meghalaya, and Delhi.

Participants: In each state, two or three districts were chosen that represented variation in accessibility and distribution across TCAM providers (e.g., small or large proportions of local health practitioners, homoeopaths, Ayurvedic and/or Unani practitioners). Per district, two blocks or geographical units were selected utilizing the criteria of proximity from district headquarters. TCAM Practitioners, administrators and representatives of community at district and state levels were chosen based on their putative roles indicated in publicly available records from state and municipal authorities. A total of 196 interviews were carried out: 74 in Kerala, and 61 each in Delhi and Meghalaya.

Primary and secondary outcome measures: We sought to understand experiences and meanings associated with integration across stakeholders, as well as barriers and facilitators to implementing policies related to integration of TCA providers at the systems level.

Results: We found that individual and interpersonal attributes tended to facilitate integration, while system features and processes tended to hinder it. Collegiality between individuals, stature and initiative of individual practitioners, along with high-level political will and/or individual access to top decision-makers enabled integration. The system was characterised, on the other

“Little somethings,” but “nothing as such”

hand, by limited channels of formal communication across systems of medicine, inappropriate design of service delivery, particularly in co-located facilities, and fragmented administrative structures.

Conclusions: Strategies that attempt to make the health systems isomorphic or receptive to individual integrative efforts may facilitate integration across systems, creating opportunities for greater collaboration and trust.

### Strengths

- \* Multi-sited qualitative study drawing on meanings and experiences across patients, providers, and health systems administrators
- \* Implementation research using rigorously applied interpretive policy analysis methods
- \* Linked to India's path on Universal Health Coverage

### Limitations

- \* Cross-sectional study, so other than self-report of historical changes, we were not able to chart or map changed views or experiences of participants in vivo.
- \* Focus on the public service delivery sector, even as a great deal of health-seeking takes place in the private sector, with the assumption that public sector strengthening is highly desirable, and possible only through focused study on it

“Little somethings,” but “nothing as such”

## Introduction

The 1978 Alma Ata declaration called for traditional medicine, treatments and practices to be “preserved, promoted and communicated widely and appropriately based on the circumstances in each country.” Thirty years later, the 2008 Beijing Declaration on Traditional Medicine called for integration of providers into national health systems, recommending systems of qualification, accreditation, regulation and communication (with allopathic providers).<sup>1</sup> These features of the Beijing Declaration were echoed at the 62<sup>nd</sup> World Health Assembly in 2009, putting out a call to action to United Nations member states to move forward with their plans for integration.<sup>2</sup> The global positioning of Traditional, Complementary, and Alternative Medicine (TCAM) has issued from and tends to imply a central focus on clinical and experimental medicine,<sup>3</sup> yet, recent calls for health systems integration, drawing attention to features like education, accreditation, regulation, and health services provision, place greater attention upon the TCAM health workforce.

In earlier work, we have identified three broad trends of integration as it relates to TCA providers: self-regulation with governmental linkage, government regulation and provisioning, and hybrid/parallel models.<sup>4</sup> This links roughly to the WHO nosology, where three models are identified: “tolerant” systems where the national health care system is based entirely on biomedicine but some TCAM practices are legally permissible, “inclusive” systems where TCAM is recognised but not fully integrated into all aspects of healthcare, and “integrative,” where TCAM is officially recognised in national drug policy, providers and products are registered and regulated, therapies are widely available and covered under insurance schemes, research and education are widely accessible.<sup>5</sup>

The situation on the ground in India, hybrid in our view, seems in parts to reflect tendencies across WHO categories. The dominance of biomedicine appears to be a critical feature of

“Little somethings,” but “nothing as such”

postcolonial health system, even as pre-independence, the TCAM practitioner community had played a major role in resisting colonial domination in the practice of (bio)medicine.<sup>6</sup> In part as a response to the reliance on allopathy throughout modern Indian history, there have been strong arguments in favour of the critical role that non-mainstream practitioners play in offering accessible, affordable, and socially acceptable health services to populations<sup>1,7,8</sup>. A study in Maharashtra reported that the situation of traditional healing as a community function through shared explanatory frameworks across provider and patient are explicitly unlike typical doctor-patient relationships.<sup>7</sup>

In India, one can also find a larger integrative framework, one that mandates “mainstreaming” of codified TCAM in India, collectively referred to as AYUSH, an acronym for Ayurveda, Yoga & Naturopathy, Unani, Siddha, Sowa-Rigpa, and Homeopathy. The National Rural Health Mission (NRHM), launched in 2005 to fortify public health in rural India, took a particular interest in integrating AYUSH practitioners through facilitation of specialised AYUSH practice, integration of AYUSH practitioners in national health programmes, integration of AYUSH modalities in primary health care, strengthening the governance of AYUSH practice, supporting AYUSH education, establishing laboratories and research facilities for AYUSH, and providing infrastructural support.<sup>8</sup> Human resource-focused strategies included contractual appointment of AYUSH doctors in Community and Primary Health Centres, appointment of paramedics, compounders, data assistants, and managers to support AYUSH practice, the establishment of specialised therapy centres for AYUSH providers; inclusion of AYUSH doctors in national disease control programmes; and incorporation of AYUSH drugs into community health workers’ primary health care kits. A recent report from the AYUSH department reports that NRHM has established AYUSH facilities in co-location with health facilities in many Indian states (notably, not in Kerala, where the stand-alone AYUSH facility is the chosen norm). As of 2012, more than three quarters of India’s district hospitals, over half of its Community Health

“Little somethings,” but “nothing as such”

Centres and over a third of India’s Primary Health Centres have AYUSH co-location, serving about 1.77 million, 3.3 million, and 100,000 rural Indians, respectively.<sup>9</sup>

And yet, even this integration framework has at most an “inclusive” character. This is reflected in findings like “official neglect” of traditional orthopaedic practitioners who have no registration, uniformity in inter-state regulation, or institutionalized medical training.<sup>10</sup> AYUSH doctors contracted to Medical Officer posts in Primary Health Centres (PHCs) in Andhra Pradesh report numerous lacunae in the implementation of the mainstreaming initiatives in the National Rural Health Mission (NRHM):<sup>11</sup> job prerequisites are not indicated, no benefits or allowances provided for health, housing or education, and compensation packages are much lower than those of allopathic doctors. Support for AYUSH practice is also inadequate (lack of infrastructure, trained assistants, and drug supply) and unethical practices have also been reported (documenting attendance of absentees, non-AYUSH personnel refusal to collaborate). Evidence from NRHM suggests that reshuffled AYUSH providers practice forms of medicine beyond the scope of their training.<sup>12</sup> Paradoxically, moreover, some Indian states prohibit cross-system prescription, adding ethical dilemmas for TCA practitioners who serve as the only medical practitioner in resource-poor areas.<sup>26</sup>

At a larger scale, current practices of integration (as in NRHM) have been described as substitution and replacement; which tend to ignore the merits of TCAM and present more barriers than facilitators of integration. **Error! Bookmark not defined.** Particularly given the strong push towards co-location and other strategies of integration as part of India’s move towards Universal Health Coverage however, the integration of AYUSH practitioners could result in a doubling of the health workforce. And yet, there are strong fears that such an emphasis on quantitative aspects of integration, i.e. having the right number of practitioners placed at facilities is inadequate. There is a need to critically appraise the government infrastructure to support TCA, identify barriers and facilitators to integration that have emerged

“Little somethings,” but “nothing as such”

from this rapid placement of these practitioners, and how these TCA practitioners, allopathic practitioners, and health system actors are reacting and adapting to each.

## Methods

This analysis draws from a larger mixed methods implementation research study aimed at understanding operational and ethical challenges in integration of TCA providers for delivery of essential health services in three Indian states.

Our study was based on action-centred frameworks<sup>13</sup> with a focus on policy *actors* and *processes*.<sup>14</sup> We have therefore sought to understand the implementation of integration policies empirically. A team of four field researchers was oriented by the principal investigator and advisor to the post-positivist paradigm of research, using Yanow’s model of interpretative policy analysis, where the emphasis is equally on describing the experience of policy processes, and on elaborating the meanings actors attach to those processes.<sup>15</sup> The research protocol was approved by the Institutional Review Board of the Public Health Foundation of India.

Our methods included semi-structured in-depth interviews with policymakers, administrators, TCAM and allopathic practitioners, traditional healers, health workers and community representatives in three diverse Indian states: Kerala, where a number of systems have strong historical and systemic roots (N=74), Meghalaya, where local health traditions hold sway (N=61), and Delhi, where national, state, and municipal jurisdictions interface with multiple systems of medicine (N=61). Participants were selected based upon maximum variation criteria for each category. We sought to represent different schemes, levels of implementation (directorates, zonal officers), systems of medicine, types of establishments (hospital, dispensary), and years of experience.

In each state, one senior researcher, a research associate and a field researcher developed selection matrices to achieve maximum variation across each category of respondents. In each



“Little somethings,” but “nothing as such”

state, two districts were chosen (in the case of Delhi, three municipal zones) that represented variation in accessibility and distribution across TCA providers (eg. small or large proportions of local health practitioners, homeopaths, Ayurvedic and/or Unani practitioners). Publicly available records from state and municipal authorities were consulted in order to determine location and type of facility (co-located, stand-alone) as well as suggestions and recommendations from Key Informants. Interviews were undertaken only with prior informed consent, and separate consent to record interviews. Data were transcribed and stored in password-protected folders and each transcript was checked by investigators for corrections and quality of transcription.

Textual data from transcripts of interviews were analysed through a combination of deductive and inductive techniques in the “framework” approach of qualitative analysis for applied policy research<sup>16</sup> using ATLAS.ti<sup>7</sup> software. Themes were developed in three iterations: in the first stage, the lead researcher from each state applied *a priori* codes and closely perused transcripts to devise *emergent* codes, with the support of the research associate. Researchers coded part of each other’s state datasets to ensure that codes were being applied in a similar, uniform manner. In the second stage, agreement and consolidation of emergent codes across three sites took place under the direction of the study lead; these were then applied to data from each state by its respective lead researcher. Concurrently, lead researchers developed super-codes, or *analytic* codes to group emergent codes. The study lead finalised and then indexed across sites to arrive at results.

Emergent and analytic code families were used to develop analyses, involving sharing of data and consultation across sites. We present emergent codes related to experiences and interpretations of integration.

## Results

*Individual experiences and meanings – collaboration and trust*

“Little somethings,” but “nothing as such”

We found that collaboration and trust appeared to be features of individual and interpersonal relationships across providers and system actors. For instance, many reported collegiality between and across TCA and allopathic practitioners. In Meghalaya, an allopathic medical officer noted that in some places Ayurvedic and homeopathic doctors were collaborating closely with his colleagues, expressing an interest in learning more about allopathic practices.

Another aspect was the “stature” of individual practitioners. In Kerala, an Ayurvedic practitioner noted that: “Nobody can question MSV if he says that taking *chavanaprasham* [health paste] will lead to DNA repair, then nobody can question because they are saying with authority. They are beyond questioning. If somebody else is saying [the same thing,] they will ask where is the proof?” This was also the case with a private sector entity that had opened a branch in Delhi. Practitioners in this institution had a high reputation and enjoyed collegiality with allopathic providers across the city, but this could not be generalised to the system of medicine in general.

Political will of highly networked individuals and/or individual access to top decision-makers also facilitated integration. In fact, one of the health system actors had participated in high level negotiations with political leaders in the country to get the AYUSH department formed (formerly the Indian Systems of Medicine & Homeopathy department) in 1995 – which in many ways marks a critical step in the attention given to integration in the health system. Within the state of Delhi, furthermore, it was the demand articulated by city councillors and ward leaders that resulted in the construction of dispensaries and AYUSH wards in hospitals, so much so that this was considered a norm. In Meghalaya, an AYUSH doctor described cordial relations with the administration, such that when medicine stock-outs happened, this officer supplied stop-gap funds to acquire medicines.

Many of the participants we spoke to in Delhi were familiar with each other – these personal relationships and interactions, more often than official platforms, were the basis for interaction, cross-referral, collective planning and advocacy, and in rarer cases, collaborative research. Across

“Little somethings,” but “nothing as such”

states, we heard of individual practitioners exercising personal initiative to hasten improvements in infrastructure with the Public Works Department, to increase the visibility of their practice in the facility with their superintendents, and so on.

Personal experience across systems also helped built trust. In Kerala, an allopath indicated that his own mother-in-law was under Ayurvedic treatment for chronic illness and that she and others he knew were “getting good relief.” He noted that Ayurveda was trustworthy based on this experience. As an Ayurvedic practitioner in Delhi put it, “if one takes a personal interest, there can be a little something.” Indeed for this practitioner, success was measured in much humbler “little somethings” given the larger systemic constraints in the way of integration.

*Group or system-linked experiences and meanings –distrust and fragmentation*

When speaking about providers as a cadre or group or of systems in general, we noted that difference and distrust tended to be highlighted. In Meghalaya, an allopath opined “Please, if you want us to work in a normal way, you know, peacefully, just have these people removed.” A similar sentiment was expressed by a senior Unani hospital practitioner in Delhi, “We can interact as a pathy but our basic concepts do not match. We can’t help each other in any way. They are independent, we are independent.” There was limited value, in the view of this practitioner, in engaging with other systems of medicine. Among older generations of practitioners, relationships were more fraught, and characterised by inter-system tensions. An allopath in Kerala described at length how allopathic doctors had protested vehemently – and successfully – against a government policy posting of Ayurveda doctors getting house surgeon postings in the state. In contrast, other, usually more junior practitioners, had a high demand for inter and intra-system interaction including but also beyond the official framework of workshops, chances to “sit and talk” about benefits, collaborative research ideas, and so on.

“Little somethings,” but “nothing as such”

In addition, we observed limited formal communication across systems of medicine. As pointed out by a health system actor: “Doctors generally don’t have meetings but just like that when they sit on the table talk so then such conversations happen.”

In Delhi, chances for such interaction were constrained in the system by the fragmentation of jurisdictions and facilities, but also with respect to how providers were posted at facilities. In this state, co-location did take place, but involved an individual TCA practitioner co-located at multiple sites, while multiple allopaths served at a single site (the biomedical norm). Allopaths had more opportunities, in sheer numbers of people, availability of space and time, to communicate with each other. Given the commensurate lack of people, space and time, allopaths had fewer chances to communicate with TCA providers or TCA providers with each other. In Kerala, the limitations on communication were shaped in particular by the fact that facilities tended to be stand-alone. In Meghalaya, an Ayurveda doctor stated, simply, “I am doing my work, that is completely asocial type, separated, segregated.” There was almost no communication between local health practitioners and others – whether AYUSH or allopath simply because of a lack of systemic acknowledgement and legitimacy given to this workforce. This doctor went on: “very few people that listen to our problem. Because, we are still again you know under the general allopathic doctor, no, like our SS, DMHO even the directorate, at the directorate level, the director so when we post our problem you know, hardly like, they table that problem...”

In addition, as a cadre, AYUSH practitioners had also to contend with dissonance between their expectations and design of service delivery. We observed in many dispensaries and hospitals in Delhi that non-allopathic practitioners were assigned rooms on the top floor of the facility. And most commonly the kinds of cases that they were handling included orthopaedic ailments, and other conditions (motor, neurological, gastric) that constrained mobility and created a very real barrier of access to care within a health care facility for patients.

“Little somethings,” but “nothing as such”

There was also a mismatch in the expectation and provision of diagnostic services, and of human resources. Both homeopathic and Ayurvedic practitioners in Kerala noted the recourse to outsourcing diagnostic investigations because of the lack of facilities in their institutions. Further, there was reliance upon contractual recruitment of human resources to address shortages, which affected the stability and reliability of service delivery, in their view. When we asked an administrator of one of Delhi’s newest, state-of-the-art Ayurvedic facilities what kind of coordination occurred across departments as part of the hospital’s functioning, he shrugged and replied, “Nothing as such!”

## Discussion

Most striking in our findings is the emergence of individual experiences and interpretations as enablers or facilitators of convergence, in the form of collegiality, recognition of stature, exercise of individual agency and cross-referral. These individual efforts were premised on trust and dialogue. In contrast, distrust, poor design and fragmentation at the systems level appears to be a barrier to integrative efforts. It is a system where “little somethings” of individuals that catalyse integration are met with “nothing as such” at the systems level.

Some of our findings are not new – the experience of lack of interaction has emerged in Hollenberg’s study on an integrated practice, which reported that weekly doctors’ meetings included only biomedical doctors, not CAM.<sup>17</sup> This study also reported the “geographical dominance” of biomedical doctors in terms of location of consulting rooms, as was found in our study. A study by Broom and colleagues found tension, mistrust and dichotomy (rational/irrational, physical/metaphysical, traditional/modern), as well as some inconsistencies in practice, and stated values, regarding biomedicine and TCAM, among Indian oncologists.<sup>18</sup> Such challenges were also seen in our study.

“Little somethings,” but “nothing as such”

Our study also revealed some unique findings with respect to the extant literature. Chung et al, attributed low referral from biomedicine to TCAM in Hong Kong to the lack of articulated and enforced procedures of referral in an integrated medical establishment. In the Indian case, it appears that the vagueness of process both allows ad hoc interactions and referrals based on personal rapport and at the same time discourages the kind of predictable, routine interactions that would allow such rapport to be built. Speaking of integration of Sowa-Rigpa in Bhutan since 1967, Wangchuk and colleagues suggest that there are managerial lessons offered by the juxtaposition and collaboration of conceptually distinct systems within a single administrative and policy unit, such as a ministry.<sup>19</sup> In effect, as they point out, services may not be co-located, but their administration necessarily will be. One could argue that India’s case is different – whether in facilities or administratively, it is not just two systems, but more like eight (across AYUSH systems), that are to be integrated, introducing internal hierarchies and complexities that are unique and interlinked. In the 1990s and early 2000s, it was argued that integration is about a “battle between two scientific truths,”<sup>20</sup> or that the CAM field creates two tendencies: “uninformed skeptics who don’t believe in anything, and uncritical enthusiasts who don’t care about data.”<sup>21</sup> Analysis of service delivery in India over a decade later suggests that there are multiple battles being fought – epistemological, logistical, ethical, and operational across systems, with (re)conciliatory intercession, at times, of individuals.

## Conclusion

Battles occur between armies, while acts of diplomacy involve intricate latticework relationships individuals with overlapping needs and interests. Our research across three very different Indian states – Kerala, Meghalaya and Delhi - suggests that strategies that attempt to make the health systems isomorphic or receptive to individual integrative efforts may facilitate integration across systems, creating opportunities for greater collaboration, and trust. The strategies to this end will

“Little somethings,” but “nothing as such”

accordingly need to be individually tailored and carefully devised, so that the system is both more receptive to and reflective of, integrative human agency.

For peer review only

“Little somethings,” but “nothing as such”

## Acknowledgements

This research was supported by a Wellcome Trust Capacity Strengthening Strategic Award to the Public Health Foundation of India and a consortium of UK universities. We are grateful for the field support of Kaveri Mayra, Candida Thangkhiew, Bobbylin Nadon, Darisuk Kharlyngdoh, Ivanhoe Marak, as well as Sabitha Chandran, and the guidance of Dr. Sandra Albert.

## Contributorship Statement

Kabir Sheikh and John Porter made substantial contributions to the conception or design of the work; while Devaki Nambiar, Venkatesh Narayan, JK Lakshmi, and TN Sathyanarayana made substantial contributions to the acquisition. All authors substantially contributed to the analysis, and interpretation of data for the work. With Devaki Nambiar playing a lead, coordinating role in drafting the work, all authors revised it critically for important intellectual content, giving final approval of the version to be published. Further, all authors agree to be accountable for all aspects of the work in ensuring that questions related to the accuracy or integrity of any part of the work are appropriately investigated and resolved.

## Data Sharing Statement

Unpublished data, in summary form is available to all those who wish to see it. They need only email the lead author.

## References



“Little somethings,” but “nothing as such”

---

1  
2  
3  
4  
5  
6  
7  
8  
9  
10  
11  
12  
13  
14  
15  
16  
17  
18  
19  
20  
21  
22  
23  
24  
25  
26  
27  
28  
29  
30  
31  
32  
33  
34  
35  
36  
37  
38  
39  
40  
41  
42  
43  
44  
45  
46  
47  
48  
49  
50  
51  
52  
53  
54  
55  
56  
57  
58  
59  
60

<sup>1</sup> World Health Organization. WHO congress on traditional medicine 2008: Beijing declaration. WHO,2011.

<sup>2</sup> *Resolution of the 62nd World Health Assembly on Traditional Medicine 2009*. EB124.R9. Geneva: WHA; 2009.

<sup>3</sup> Bodeker G, Kronenberg F. A public health agenda for traditional, complementary, and alternative medicine. *Am J Public Health* 2002;92:1582–91.

<sup>4</sup> Sheikh K, Nambiar D. Government policies for traditional, complementary and alternative medical services in India: from assimilation to integration? *Natl Med J India* 2011;24:245–6.

<sup>5</sup> McLeod H, Chung VCH. The Integration of Traditional and Complementary Medicine in Health Systems. *Presented at the Joint LACA, LAAHS, and PBSS Colloquium*. Hongkong. 2012. [http://www.actuaries.org/HongKong2012/Presentations/TBR11\\_McLeod.pdf](http://www.actuaries.org/HongKong2012/Presentations/TBR11_McLeod.pdf) (accessed 9 Sep 2013).

<sup>6</sup> Quaiser N. Essentialising the body. Locating medical domination and resistance. *The Newsletter*. Autumn 2013. <http://www.ias.nl/the-newsletter/article/essentialising-body-locating-medical-domination-and-resistance> (accessed 21 Jan 2013).

<sup>7</sup> Lohokare M, Davar BV. The Community Role of Indigenous Healers. In: Sheikh K, George A (eds.) *Health Providers in India: On the Frontlines of Change*. New Delhi: Routledge; 2011. p161–81.

<sup>8</sup> Department of Health and Family Welfare. *Mainstreaming AYUSH under NRHM*. <http://203.193.146.66/hfw/PDF/ayus.pdf> (accessed 31 Mar 2011).

“Little somethings,” but “nothing as such”

---

<sup>9</sup> Department of AYUSH. *AYUSH under NRHM*.

<http://indianmedicine.nic.in/writereaddata/linkimages/4468616884->

[AYUSH%20under%20NRHM.pdf](#) (accessed 5 Sep 2013).

<sup>10</sup> Unnikrishnan PM, Kumar LHP, Shankar D. Traditional Orthopaedic Practitioners' Place in Contemporary India: A Case Study from Southern India. In: Sheikh K, George A (eds.) *Health Providers in India: On the Frontlines of Change*. New Delhi: Routledge; 2011. p182–99.

<sup>11</sup> Lakshmi JK. Less equal than others? Experiences of AYUSH medical officers in primary health centres in Andhra Pradesh. *Indian J Med Ethics* 2012;9:18–21.

<sup>12</sup> Priya R, Shweta AS. *Status and Role of AYUSH and Local Health Traditions: Under the National Rural Health Mission, Report of a Study*. National Health Systems Resource Centre. 2010.

<sup>13</sup> Barrett S, Fudge C. *Policy and action: essays on the implementation of public policy*. London: Methuen; 1981.

<sup>14</sup> Walt G, Gilson L. Reforming the health sector in developing countries: the central role of policy analysis. *Health Policy Plan* 1994;9:353–70.

<sup>15</sup> Yanow D. *Conducting Interpretive Policy Analysis*. Newbury Park, CA: Sage; 2000.

<sup>16</sup> Ritchie J, Spencer L. Qualitative Data Analysis for Applied Policy Research. In *Analyzing qualitative data*. London: Routledge; 1994. p173-94.

<sup>17</sup> Hollenberg D. Uncharted ground: Patterns of professional interaction among complementary/alternative and biomedical practitioners in integrative health care settings. *Soc Sci Med* 2006;62:731-44.

“Little somethings,” but “nothing as such”

---

1  
2  
3  
4  
5  
6  
7  
8  
9  
10  
11  
12  
13  
14  
15  
16  
17  
18  
19  
20  
21  
22  
23  
24  
25  
26  
27  
28  
29  
30  
31  
32  
33  
34  
35  
36  
37  
38  
39  
40  
41  
42  
43  
44  
45  
46  
47  
48  
49  
50  
51  
52  
53  
54  
55  
56  
57  
58  
59  
60

<sup>18</sup> Broom A, Doron A, Tovey P. The inequalities of medical pluralism: Hierarchies of health, the politics of tradition and the economies of care in Indian oncology. *Soc Sci Med* 2009;69:698–706.

<sup>19</sup> Wangchuk P, Wangchuk D, Aagaard-Hansen J. Traditional Bhutanese medicine (gSo-BA Rig-PA): an integrated part of the formal health care services. *Southeast Asian J Trop Med Public Health* 2007;38:161–7.

<sup>20</sup> Bloom H. *The Lucifer Principle. A Scientific Expedition into the Forces of History*. New York: The Atlantic Monthly Press;1995.

<sup>21</sup> Northridge ME, Mack Jr R. Integrating ethnomedicine into public health. *Am J Public Health* 2002;92:1561-61.

# BMJ Open

## Experiences and meanings of integration of TCAM (Traditional, Complementary and Alternative Medical) providers in three Indian states: Results from a cross- sectional, qualitative implementation research study

|                                 |                                                                                                                                                                                                                                                                                                                                                                                                                                 |
|---------------------------------|---------------------------------------------------------------------------------------------------------------------------------------------------------------------------------------------------------------------------------------------------------------------------------------------------------------------------------------------------------------------------------------------------------------------------------|
| Journal:                        | <i>BMJ Open</i>                                                                                                                                                                                                                                                                                                                                                                                                                 |
| Manuscript ID:                  | bmjopen-2014-005203.R1                                                                                                                                                                                                                                                                                                                                                                                                          |
| Article Type:                   | Research                                                                                                                                                                                                                                                                                                                                                                                                                        |
| Date Submitted by the Author:   | 24-May-2014                                                                                                                                                                                                                                                                                                                                                                                                                     |
| Complete List of Authors:       | Nambiar, Devaki; Public Health Foundation of India, Narayan, Venkatesh; All India Institute of Medical Sciences, Lakshmi, JK; Indian Institute of Public Health - Hyderabad, Porter, John; London School of Hygiene & Tropical Medicine, Department of Clinical Research Sathyanarayana, TN; Indian Institute of Public Health-Bangalore Campus, Health Policy and Management Sheikh, Kabir; Public Health Foundation of India, |
| <b>Primary Subject Heading</b>: | Health services research                                                                                                                                                                                                                                                                                                                                                                                                        |
| Secondary Subject Heading:      | Global health, Qualitative research                                                                                                                                                                                                                                                                                                                                                                                             |
| Keywords:                       | COMPLEMENTARY MEDICINE, International health services < HEALTH SERVICES ADMINISTRATION & MANAGEMENT, QUALITATIVE RESEARCH                                                                                                                                                                                                                                                                                                       |
|                                 |                                                                                                                                                                                                                                                                                                                                                                                                                                 |

SCHOLARONE™  
Manuscripts

only

Running Head: Experiences and meanings of integration

Title: Experiences and meanings of integration of TCAM (Traditional, Complementary and Alternative Medical) providers in three Indian states: Results from a cross-sectional, qualitative implementation research study

Authors: D Nambiar,<sup>1</sup> VV Narayan,<sup>2</sup> JK Lakshmi,<sup>3</sup> J Porter,<sup>4</sup> TN Sathyanarayana,<sup>33</sup> K Sheikh<sup>9</sup>

1 Public Health Foundation of India, New Delhi, India

2 All India Institute of Medical Sciences, New Delhi, India

3 Indian Institute of Public Health, Hyderabad, India

4 London School of Hygiene and Tropical Medicine, London, United Kingdom

Corresponding Author Information:

Devaki Nambiar, PhD

Research Scientist

Public Health Foundation of India

ISID, 4 Institutional Area

Vasant Kunj 110067

Keywords: Alternative Medicine, Qualitative Evaluation, World Health

Word Count: 3,868868

**Abstract:**

Objectives: Efforts to engage Traditional Complementary and Alternative Medical (TCAM) practitioners in the public health workforce have growing relevance for India's path to universal health coverage. We used an action-centred framework to understand how policy prescriptions related to integration were being implemented in three distinct Indian states.

Setting: Health departments and district-level primary care facilities in the states of Kerala, Meghalaya, and Delhi.

Participants: In each state, two or three districts were chosen that represented variation in accessibility and distribution across TCAM providers (e.g., small or large proportions of local health practitioners, Homoeopaths, Ayurvedic and/or Unani practitioners). Per district, two blocks or geographical units were selected. TCAM and allopathic practitioners, administrators and representatives of community at district and state levels were chosen based on publicly available records from state and municipal authorities. A total of 196 interviews were carried out: 74 in Kerala, and 61 each in Delhi and Meghalaya.

Primary and secondary outcome measures: We sought to understand experiences and meanings associated with integration across stakeholders, as well as barriers and facilitators to implementing policies related to integration of TCA providers at the systems level.

Results: We found that individual and interpersonal attributes tended to facilitate integration, while system features and processes tended to hinder it. Collegiality, recognition of stature, exercise of individual personal initiative among TCA practitioners and of personal experience of TCAM among allopaths enabled integration. The system was characterised, on the other hand, by fragmentation of jurisdiction and facilities, inter-system isolation, lack of trust in and awareness of TCA systems, and inadequate infrastructure and resources for TCA service delivery.

1  
2  
3 Conclusions: State-tailored strategies that routinise interaction, reward individual and system-  
4  
5 level individual integrative efforts, fostered by high level political will are recommended.  
6  
7

## 8 9 **Strengths**

10  
11 \* Multi-sited qualitative study drawing on meanings and experiences across patients, providers,  
12  
13 and health systems administrators  
14

15  
16  
17 \* Implementation research using rigorously applied interpretive policy analysis methods  
18

19  
20 \* Linked to India's path on Universal Health Coverage  
21  
22

## 23 24 **Limitations**

25  
26  
27 \* Cross-sectional study, so other than self-report of historical changes, we were not able to chart  
28  
29 or map changed views or experiences of participants in vivo.  
30

31  
32 \* Focus on the public service delivery sector, even as a great deal of health-seeking takes place in  
33  
34 the private sector, with the assumption that public sector strengthening is highly desirable, and  
35  
36 possible only through focused study on it.  
37  
38  
39  
40  
41  
42  
43  
44  
45  
46  
47  
48  
49  
50  
51  
52  
53  
54  
55  
56  
57  
58  
59  
60

## Introduction

The 1978 Alma Ata declaration called for traditional medicine, treatments and practices to be “preserved, promoted and communicated widely and appropriately based on the circumstances in each country.” Thirty years later, the 2008 Beijing Declaration on Traditional Medicine called for integration of providers into national health systems, recommending systems of qualification, accreditation, regulation and communication (with allopathic providers).<sup>1</sup> These features of the Beijing Declaration were echoed at the 62<sup>nd</sup> World Health Assembly in 2009, putting out a call to action to United Nations member states to move forward with their plans for integration.<sup>2</sup> The global positioning of Traditional, Complementary, and Alternative Medicine (TCAM) has issued from and tends to imply a central focus on clinical and experimental medicine,<sup>3</sup> yet, recent calls for health systems integration, drawing attention to features like education, accreditation, regulation, and health services provision, draw attention to the TCAM health workforce.

In earlier work, we have identified three broad trends of integration as it relates to TCA providers: self-regulation with governmental linkage, government regulation and provisioning, and hybrid/parallel models.<sup>4</sup> This links roughly to the WHO nosology, where three models are identified: “tolerant” systems where the national health care system is based entirely on biomedicine but some TCAM practices are legally permissible, “inclusive” systems where TCAM is recognised but not fully integrated into all aspects of healthcare, and “integrative,” where TCAM is officially recognised in national drug policy, providers and products are registered and regulated, therapies are widely available and covered under insurance schemes, research and education are widely accessible.<sup>5</sup>

The situation on the ground in India, hybrid in our view, seems in parts to reflect tendencies across WHO categories. The dominance of biomedicine appears to be a critical feature of India’s postcolonial health system, even as pre-independence, the TCAM practitioner community had



1  
2  
3 played a major role in resisting colonial domination in the practice of (bio)medicine.<sup>6</sup> In part as a  
4  
5 response to the reliance on allopathy throughout modern Indian history, there have been strong  
6  
7 arguments in favour of the critical role that non-mainstream practitioners play in offering  
8  
9 accessible, affordable, and socially acceptable health services to populations.**Error! Bookmark**  
10  
11 **not defined.**<sup>7,8</sup> A study in Maharashtra reported that the situation of traditional healing as a  
12  
13 community function through shared explanatory frameworks across provider and patient are  
14  
15 explicitly unlike typical doctor-patient relationships.<sup>9</sup>  
16  
17

18  
19 In India, one can also find a larger integrative framework, one that mandates “mainstreaming” of  
20  
21 codified TCAM in India, collectively referred to as AYUSH, an acronym for Ayurveda, Yoga &  
22  
23 Naturopathy, Unani, Siddha, Sowa-Rigpa, and Homoeopathy. The National Rural Health  
24  
25 Mission (NRHM), launched in 2005 to fortify public health in rural India, took a particular  
26  
27 interest in integrating AYUSH practitioners through facilitation of specialised AYUSH practice,  
28  
29 integration of AYUSH practitioners in national health programmes, incorporation of AYUSH  
30  
31 modalities in primary health care, strengthening the governance of AYUSH practice, support  
32  
33 forfor AYUSH education, establishment of laboratories and research facilities for AYUSH, and  
34  
35 providing infrastructural support.<sup>10</sup> Human resource-focused strategies included contractual  
36  
37 appointment of AYUSH doctors in Community and Primary Health Centres, appointment of  
38  
39 paramedics, compounders, data assistants, and managers to support AYUSH practice,  
40  
41 establishment of specialised therapy centres for AYUSH providers,, inclusion of AYUSH  
42  
43 doctors in national disease control programmes; and incorporation of AYUSH drugs into  
44  
45 community health workers’ primary health care kits. A recent report from the AYUSH  
46  
47 department reports that NRHM has established AYUSH facilities in co-location with health  
48  
49 facilities in many Indian states (notably, not in Kerala, where the stand-alone AYUSH facility is  
50  
51 the chosen norm).<sup>11</sup> As of 2012, more than three quarters of India’s district hospitals, over half  
52  
53 of its Community Health Centres and over a third of India’s Primary Health Centres have  
54  
55  
56  
57  
58  
59  
60

1  
2  
3 AYUSH co-location, serving about 1.77 million, 3.3 million, and 100,000 rural Indians,  
4  
5 respectively.<sup>11</sup>  
6  
7

8 And yet, even this integration framework has at most an “inclusive” character. This is reflected  
9  
10 in findings like “official neglect” of traditional orthopaedic practitioners who have no  
11  
12 registration, uniformity in inter-state regulation, or institutionalized medical training.<sup>12</sup> AYUSH  
13  
14 doctors contracted to Medical Officer posts in Primary Health Centres (PHCs) in the southern  
15  
16 Indian state of Andhra Pradesh report numerous lacunae in the implementation of the  
17  
18 mainstreaming initiatives in the National Rural Health Mission (NRHM):<sup>13</sup> job perquisites are not  
19  
20 indicated, no benefits or allowances provided for health, housing or education, and  
21  
22 compensation packages are much lower than those of allopathic doctors. Support for AYUSH  
23  
24 practice is also inadequate (lack of infrastructure, trained assistants, and drug supply) and  
25  
26 unethical practices have also been reported (documenting attendance of absentees, and non-  
27  
28 cooperation from non-AYUSH personnel). Evidence from NRHM suggests that reshuffled  
29  
30 AYUSH providers practice forms of medicine beyond the scope of their training.<sup>14</sup> Paradoxically,  
31  
32 moreover, some Indian states prohibit cross-system prescription, adding ethical dilemmas for  
33  
34 TCA practitioners who serve as the only medical practitioner in resource-poor areas.<sup>14</sup>  
35  
36  
37  
38

39 At a larger scale, current practices of integration (as in NRHM) have been described as  
40  
41 substitution and replacement; which tend to ignore the merits of TCAM and present more  
42  
43 barriers than facilitators of integration.<sup>7</sup> Particularly given the strong push towards co-location  
44  
45 and other strategies of integration as part of India’s move towards Universal Health Coverage,  
46  
47 the integration of AYUSH practitioners could result in a doubling of the health workforce. And  
48  
49 yet, there are strong fears that such an emphasis on quantitative aspects of integration, i.e. having  
50  
51 the right number of practitioners placed at facilities is inadequate. There is a need to critically and  
52  
53 qualitatively appraise the government infrastructure to support TCA, identify barriers and  
54  
55 facilitators to integration that have emerged from this rapid placement of these practitioners, and  
56  
57  
58  
59

1  
2  
3 how these TCA practitioners, allopathic practitioners, and health system actors are reacting and  
4  
5 adapting to each.  
6  
7

## 8 9 10 **Methods**

11  
12 This analysis draws from a larger mixed methods implementation research study aimed at  
13  
14 understanding operational and ethical challenges in integration of TCA providers for delivery of  
15  
16 essential health services in three Indian states. The study looked at the contents and  
17  
18 implementation of TCA provider integration policies in 3 states and at national level examining  
19  
20 the understanding and interpretations of integration from the perspectives of different health  
21  
22 systems actors. These coupled with their experiences in the actual processes of integration of  
23  
24 TCA providers were studied using qualitative interview methods to help identify systemic and  
25  
26 ethical challenges. Based on this, the study sought to derive strategies to augment the integration  
27  
28 of TCA providers in the delivery of essential health services.  
29  
30

31  
32 Our study was based on action-centred frameworks<sup>15</sup> with a focus on policy *actors* and  
33  
34 *processes*.<sup>16</sup> We have therefore sought to understand the implementation of integration policies  
35  
36 empirically. A team of four field researchers was oriented by the principal investigator and  
37  
38 advisor to the post-positivist paradigm of research, using Yanow's model of interpretative policy  
39  
40 analysis, where the emphasis is equally on describing the experience of policy processes, and on  
41  
42 elaborating the meanings actors attach to those processes.<sup>17</sup> The research protocol was approved  
43  
44 by the Institutional Ethics Committee of the Public Health Foundation of India.  
45  
46  
47

48  
49 Our methods included semi-structured in-depth interviews (see interview guides, Appendix 1)  
50  
51 with policymakers (N=12), administrators (N=43), TCAM practitioners, (N=59) allopathic  
52  
53 practitioners (N=37), traditional healers (N=7), as well as health workers and community  
54  
55 representatives (N=38) in three diverse Indian states (see map, Figure 1). We undertook the  
56  
57 study in Kerala, where a number of systems have strong historical and systemic roots (N=74),  
58  
59

1  
2  
3 Meghalaya, where local health traditions hold sway (N=61), and Delhi, where national, state, and  
4  
5 municipal jurisdictions interface with multiple systems of medicine (N=61). Participants were  
6  
7 selected based upon maximum variation criteria for each category. We sought to represent  
8  
9 different schemes, levels of implementation (directorates, zonal officers), systems of medicine,  
10  
11 types of establishments (hospital, dispensary), and years of experience.  
12  
13

14  
15 In each state, one senior researcher, a research associate and a field researcher developed  
16  
17 selection matrices to achieve maximum variation across each category of respondents. In each  
18  
19 state, two districts were chosen (in the case of Delhi, three municipal zones) that represented  
20  
21 variation in accessibility and distribution across TCA providers (eg. small or large proportions of  
22  
23 local health practitioners, Homoeopaths Homoeopaths, Ayurvedic and/or Unani practitioners).  
24  
25 Publicly available records from state and municipal authorities were consulted in order to  
26  
27 determine location and type of facility (co-located, stand-alone) as well as suggestions and  
28  
29 recommendations from Key Informants. We also ensured that facilities closest to and furthest  
30  
31 from district headquarters were chosen for interviews, to maximise variability. We would  
32  
33 typically contact providers via cell phone, share information about the study verbally or via email,  
34  
35 and set up a time to interview them. In some cases, we would arrive during out-patient clinic  
36  
37 hours to the chosen facility, share our participant information sheet and seek an appointment  
38  
39 time with eligible participants. In most cases, we found that participants were keen to participate  
40  
41 once they were aware of the nature of the study and, in some cases, the assurance of  
42  
43 confidentiality. We had no refusals, although some allopathic practitioners had to be persuaded  
44  
45 to participate by emphasizing that this study was not “pro-TCAM integration” per se, but merely  
46  
47 seeking to understand state policy implementation. Interviews, ranging from 15 to 90 minutes in  
48  
49 length were undertaken, always with prior informed consent, and separate consent to record  
50  
51 interviews. Data transcribed and stored in password-protected folders and each transcript was  
52  
53 checked by investigators for accuracy and quality of transcription.  
54  
55  
56  
57  
58  
59  
60

1  
2  
3 Textual data from transcripts of interviews as well as notes and observations of facilities and  
4  
5 service delivery recorded during fieldwork were analysed through a combination of deductive  
6  
7 and inductive techniques in the “framework” approach of qualitative analysis for applied policy  
8  
9 research<sup>18</sup> using ATLAS.ti7 software. Themes were developed in three iterations: in the first stage,  
10  
11 the lead researcher from each state applied *a priori* codes and closely perused transcripts to devise  
12  
13 *emergent* codes, with the support of the Research Associate. RA *A priori* codes were based on our  
14  
15 research questions, reflecting experiences, interpretations and meanings of integration (eg.  
16  
17 Tc\_Ap\_El\_Adm refers to a TCAM providers’ explanation of experience of interactions with  
18  
19 administration in the facility or the health care system). *Emergent* codes were used to describe the  
20  
21 content or categories of these experiences, interpretations and meanings (eg. Em\_El\_IndInit  
22  
23 refers to personal initiative as a determinant of integration). Researchers coded 20% of each  
24  
25 other’s state datasets to ensure that codes were being applied in a similar, uniform manner. In the  
26  
27 second stage, agreement and consolidation of emergent codes across three sites took place under  
28  
29 the direction of the study lead; these were then applied to data from each state by its respective  
30  
31 lead researcher. Concurrently, lead researchers developed super-codes, or *analytic* codes to group  
32  
33 emergent codes (eg. An\_Ope\_Adhoc refers to adhocism in policies and practices related to  
34  
35 integration). The study lead finalised and then indexed across sites to arrive at results. Emergent  
36  
37 and analytic code families were used to develop analyses, involving sharing of data and  
38  
39 consultation across sites. In this paper, we focus on emergent codes related to experiences and  
40  
41 interpretations of integration.  
42  
43  
44  
45  
46  
47

## 48 Results

49  
50 We found that facilitators of integration emerged from individual and interpersonal relationships,  
51  
52 while barriers were identified at the systems level (see Table 1).  
53  
54

55  
56 *Facilitators at the individual/interpersonal level*  
57  
58

1  
2  
3 A) *Collegiality between practitioners within facilities*  
4  
5

6 Interpersonal collegiality was between and across TCA and allopathic practitioners. In  
7 Meghalaya, an allopathic medical officer noted that in some places Ayurvedic and  
8 Homoeopathic doctors were collaborating closely with his colleagues, expressing an interest  
9 in learning more about allopathic practices. In the same state, an AYUSH doctor described  
10 cordial relations with the administration, such that when medicine stock-outs happened, the  
11 allopathic medical officer supplied stop-gap funds to acquire medicines.  
12  
13  
14  
15  
16  
17  
18

19 B) *Stature of TCA doctors*  
20  
21

22 Another aspect was the “stature” of individual practitioners. In Kerala, an Ayurvedic practitioner  
23 noted that: “Nobody can question <Name of Well Known Ayurvedic Physician from Kerala>.  
24 If he says that taking *chavanaprasham* [health paste] will lead to DNA repair, then nobody can  
25 question because they are saying with authority. They are beyond questioning. If somebody else is  
26 saying [the same thing,] they will ask, where is the proof?” This was also the case with a private  
27 sector entity that had opened a branch in Delhi. Practitioners in this institution were highly  
28 reputed, involved with transnational research collaborations, and reported numerous cross-  
29 referrals from allopathic providers across the city. .  
30  
31  
32  
33  
34  
35  
36  
37  
38  
39

40 C) *Personal initiative of TCA doctors*  
41  
42

43 Across states, we heard of individual TCA practitioners exercising personal initiative to hasten  
44 improvements in infrastructure and service delivery. Following is an excerpt of an interview  
45 with an Ayurvedic doctor from a Delhi hospital: “There is a lack of storage space so the  
46 diagnosis room is being used for some storage. But I have been treating people in the Public  
47 Works Department and then it is getting resolved!” Many of the participants we spoke to in  
48 many states were familiar with each other – these personal relationships and interactions, in the  
49  
50  
51  
52  
53  
54  
55  
56  
57  
58  
59  
60

1  
2  
3 absence of official or regular platforms, were the basis for interaction, cross-referral, collective  
4  
5 planning and advocacy, and in rarer cases, collaborative research.  
6  
7

8 ***D) Personal experience of allopaths***  
9

10 Personal experience across systems also helped built trust. In Kerala, an allopath indicated that  
11  
12 his own mother-in-law was under Ayurvedic treatment for chronic illness and that she and  
13  
14 others he knew were “getting good relief.” He noted that Ayurveda was trustworthy based on  
15  
16 this experience. As an Ayurvedic practitioner in Delhi put it, “if one takes a personal interest,  
17  
18 there can be a little something. But everyone is busy in their own work. If it is done officially –  
19  
20 like in a month, every 2nd Saturday ...Then it will happen more systematically.”  
21  
22  
23

24  
25 ***E) Political will of senior health system actors***  
26

27  
28 Systems level integration was facilitated by highly networked individuals and/or individual access  
29  
30 to top decision-makers. One of the health system actors we interviewed had participated in high  
31  
32 level negotiations with political leaders in the country to get the AYUSH department formed  
33  
34 (formerly the Indian Systems of Medicine & Homoeopathy department) in 1995 – which in  
35  
36 many ways marks a critical step in the attention given to integration in the health system. Within  
37  
38 the state of Delhi, furthermore, it was the demand articulated by city councillors and ward  
39  
40 leaders that resulted in the construction of dispensaries and AYUSH wards in hospitals, so much  
41  
42 so that this was considered a norm.  
43  
44

45  
46 *Barriers at the system level*  
47

48  
49 ***A) Fragmentation of jurisdictions and facilities***  
50

51  
52 It was clear that systematic integration was not widely perceived in any of the facilities or states  
53  
54 studied. For one, all states had not a single unified system, but rather multiple systems with  
55  
56 parallel governance apparatuses, each with their own challenges. In fact, in Delhi, integration was  
57  
58  
59

1  
2  
3 constrained in the system by the fragmentation of jurisdictions and facilities, but also with  
4  
5 respect to how providers were posted at facilities. In this state, co-location did take place, but  
6  
7 involved an individual TCA practitioner co-located at multiple sites, while multiple allopaths  
8  
9 served at a single site (the biomedical norm). Allopaths had more opportunities, in terms of sheer  
10  
11 numbers of people, availability of space and time, to communicate with each other.  
12  
13

14  
15 **B) *Inter-system isolation and lack of communication***  
16

17  
18 Given the aforementioned lack of people, space and time, allopaths were socially isolated from,  
19  
20 and had fewer chances to communicate with TCA providers or TCA providers with each other.  
21  
22 In Kerala, the limitations on communication were shaped in particular by the fact that facilities  
23  
24 tended to be stand-alone. In Meghalaya, an Ayurveda doctor stated, simply, “I am doing my  
25  
26 work, that is completely asocial type, separated, segregated.” There was almost no  
27  
28 communication between local health practitioners and others – whether AYUSH or allopath  
29  
30 simply because of a lack of systemic acknowledgement and legitimacy given to this workforce.  
31  
32 This doctor went on: “very few people listen to our problem. Because, we are still, again, you  
33  
34 know, under the general allopathic doctor, ...so when we post our problem you know, hardly  
35  
36 like, they table that problem...”  
37  
38

39  
40 **C) *Lack of trust and awareness of TCA systems***  
41

42  
43 When speaking about providers as a cadre, group or systems in general, we noted that distrust  
44  
45 tended to be highlighted. In Meghalaya, an allopath opined “Please, if you want us to work in a  
46  
47 normal way, you know, peacefully, just have these people removed.” A similar sentiment was  
48  
49 expressed by a senior Unani hospital practitioner in Delhi, “We can interact as a *pathy* but our  
50  
51 basic concepts do not match. We can’t help each other in any way. They are independent, we are  
52  
53 independent.” There was limited value, in the view of this practitioner, in engaging with other  
54  
55 systems of medicine. An allopath in Kerala described at length how allopathic doctors had  
56  
57 protested vehemently – and successfully – against a government policy of Ayurveda doctors  
58  
59



1  
2  
3 getting house surgeon postings in the state. MoreMore junior practitioners noted that even with  
4  
5 respect to TCAM systems: “We three [Ayurveda, Unani, and Homoeopathy] are together here,  
6  
7 but cross-reference is very, very less...We don’t know what is the strong point of Ayurveda,  
8  
9 Unani. Allopath will not know the strong point of Homoeopathy, Ayurveda. They just say ‘skin!’  
10  
11 – that’s all they know!””  
12

#### 13 14 ***D) Inadequate infrastructure and resources for TCA service delivery*** 15

16  
17 Opportunities to interact were further constrained by the system design of service delivery. We  
18  
19 observed in many dispensaries and hospitals in Delhi that non-allopathic practitioners were  
20  
21 assigned rooms on the top floor of the facility, while allopaths were allocated multiple rooms on  
22  
23 the ground floor (Fieldnotes June 11<sup>th</sup>, 20<sup>th</sup>, 21<sup>st</sup>, 22<sup>nd</sup>, and 27<sup>th</sup> 2012). And, most commonly, the  
24  
25 kinds of cases that they were handling included orthopaedic ailments, and other conditions  
26  
27 (motor, neurological, gastric) that constrained mobility and created a very real barrier of access to  
28  
29 care within a health care facility for patients. Practitioners therefore spend much of their time  
30  
31 responding to these inadequacies.  
32  
33

34  
35 There were also shortcomings in the design of diagnostic services, and inadequacy of human  
36  
37 resources. Both HomoeopathicHo and Ayurvedic practitioners in Kerala noted the recourse to  
38  
39 outsourcing diagnostic investigations because of the lack of facilities in their institutions. Further,  
40  
41 there was reliance upon contractual recruitment of human resources to address shortages, which  
42  
43 affected the stability and reliability of service delivery, in their view. When we asked an  
44  
45 administrator of one of Delhi’s newest, state-of-the-art Ayurvedic facilities what kind of  
46  
47 coordination occurred across departments as part of the hospital’s functioning, he shrugged and  
48  
49 replied, “Nothing as such!”  
50  
51  
52  
53  
54  
55  
56  
57  
58  
59  
60

## Discussion

Most striking in our findings is the emergence of individual experiences and interpretations as enablers or facilitators of integration, in the form of collegiality, recognition of stature, exercise of personal initiative among TCA practitioners and of personal experience of TCAM among allopaths. In contrast, barriers to integration seemed to exist at a systems level. They included fragmentation of jurisdiction and facilities, inter-system isolation, lack of trust in and awareness of TCA systems, and inadequate infrastructure and resources for TCA service delivery. It is a system where “little somethings” of individuals that catalyse integration are met with “nothing as such” at the systems level.

Some of our findings are not new – the experience of lack of interaction has emerged in Hollenberg’s study on an integrated practice, which reported that weekly doctors’ meetings included only biomedical doctors, not CAM.<sup>19</sup> This study also reported the “geographical dominance” of biomedical doctors in terms of location of consulting rooms, as was found in our study. A study by Broom and colleagues found tension and mistrust, as well as inconsistencies in practice and values related to biomedicine and TCAM, among Indian oncologists.<sup>20</sup> Such challenges were also seen in our study.

Our study also revealed some unique findings with respect to the extant literature. Chung et al, attributed low referral from biomedicine to TCAM in Hong Kong to the lack of articulated and enforced procedures of referral in an integrated medical establishment.<sup>21</sup> In the Indian case, it appears that the vagueness of process both allows ad hoc interactions and referrals based on personal rapport and at the same time discourages the kind of predictable, routine interactions that would allow such rapport to be built. Speaking of integration of Sowa-Rigpa in Bhutan since 1967, Wangchuk and colleagues suggest that there are managerial lessons offered by the juxtaposition and collaboration of conceptually distinct systems within a single administrative and policy unit, such as a ministry.<sup>22</sup> In effect, as they point out, services may not be co-located,

1  
2  
3 but their administration necessarily should be. One could argue that India's case is different –  
4  
5 whether in facilities or administratively, it is not just two systems, but more like eight (across  
6  
7 AYUSH systems), that are to be integrated, introducing internal hierarchies and complexities that  
8  
9 are unique to the countrycountry.  
10

11  
12 In the 1990s and early 2000s, it was argued that integration is about a “battle between two  
13  
14 scientific truths,”<sup>23</sup> or that the CAM field creates two tendencies: “uninformed skeptics who  
15  
16 don't believe in anything, and uncritical enthusiasts who don't care about data.”<sup>24</sup> Analysis of  
17  
18 service delivery in India over a decade later suggests that there are multiple battles being fought –  
19  
20 epistemological, logistical, ethical, and operational across systems, with (re)conciliatory  
21  
22 intercession, at times, of individuals.  
23  
24

25  
26 How can such intercessions be encouraged, catalyzed even? We offer a few suggestions for  
27  
28 activities in the Indian case that leverage the individual facilitators of integration to fill systemic  
29  
30 gaps (see Table 2). These strategies are based on the aforementioned findings in particular states;  
31  
32 their ‘translate-ability’ to other states would have to be examined.  
33  
34

35  
36 For one, improved documentation of clinical cases across systems could be undertaken and  
37  
38 shared. We noted that those AYUSH practitioners who were documenting their practices had  
39  
40 greater stature, opportunities and topics for interaction with peers. Drawing upon personal  
41  
42 initiative and creating experiences of interaction, this could help raise the stature of TCA  
43  
44 practice, while also reducing isolation and lack of awareness. State health departments could  
45  
46 create routine opportunities for interaction and collaboration across systems, and within  
47  
48 facilities. In Delhi, polio immunization has served as an integrative platform for many  
49  
50 practitioners to work together and develop trust and ties. Within facilities, joint staff meetings  
51  
52 may serve a similar purpose. Authorities may also consider rewarding individual initiatives for  
53  
54 integration (through challenge grants or institutional recognition) - these could be designed to  
55  
56 address system-level barriers to integration. Systems-integration could also be rewarded, through  
57  
58  
59  
60

1  
2  
3 joint or synergistically achieved targets for referrals, or number of patients cared for using  
4  
5 complementary or adjuvant therapies. As of now, those reporting cross-referrals only know of  
6  
7 each other; if targets were set, there would be greater incentives for and attention to conditions  
8  
9 and protocols for cross-referral. Many practitioners we spoke to suggested that guidelines for  
10  
11 collaboration (including cross-referral) be created. We feel this itself could be a starting point of  
12  
13 collaboration amongst TCA providers and with allopathic providers. In each state, the feasibility  
14  
15 of each of these strategies would have to be determined, and given due attention through the  
16  
17 exertions of powerful stakeholders with political will, who at various points, may find themselves  
18  
19 battling each other over policies or power.  
20  
21  
22  
23

## 24 Conclusion

25  
26  
27 Battles occur between armies, while acts of diplomacy involve intricate latticework relationships  
28  
29 individuals with overlapping needs and interests. Our research across three very different Indian  
30  
31 states – Kerala, Meghalaya and Delhi - suggests that strategies that attempt to make the health  
32  
33 systems receptive to individual integrative efforts may facilitate integration across systems,  
34  
35 creating opportunities for greater collaboration, and trust. We have proposed strategies to this  
36  
37 end, which must in turn be additionally tailored to each state context, so that the health system  
38  
39 exists in a vibrant but also coherent plurality of human agency.  
40  
41  
42  
43  
44  
45  
46  
47  
48  
49  
50  
51  
52  
53  
54  
55  
56  
57  
58  
59  
60

## Tables

Table 1. Summary of Findings

|                     | Factors at Individual/Interpersonal Level                                                                                                                                                                                                                   |                 | Factors at Group/System Level                                                                                                                                                                                                                              |
|---------------------|-------------------------------------------------------------------------------------------------------------------------------------------------------------------------------------------------------------------------------------------------------------|-----------------|------------------------------------------------------------------------------------------------------------------------------------------------------------------------------------------------------------------------------------------------------------|
| <b>FACILITATORS</b> | A) <b>Collegiality</b> between practitioners within facilities<br>B) <b>Stature</b> of TCA doctors<br>C) <b>Personal initiative</b> of TCA doctors<br>D) <b>Personal experience</b> of allopaths<br>E) <b>Political will</b> of senior health system actors | <b>BARRIERS</b> | A) <b>Fragmentation</b> of jurisdiction and facilities<br>B) Inter-system <b>isolation</b> and lack of communication<br>C) Lack of <b>trust and awareness</b> of TCA systems<br>D) <b>Inadequate infrastructure and resources</b> for TCA service delivery |

Table 2. Recommendations to promote/address Integration, responding to findings

| Strategies to promote TCA integration for essential health services delivery, based on our findings                                                                                                    | FACILITATORS |         |                     |                     | BARRIERS      |           |                         |                                     |
|--------------------------------------------------------------------------------------------------------------------------------------------------------------------------------------------------------|--------------|---------|---------------------|---------------------|---------------|-----------|-------------------------|-------------------------------------|
|                                                                                                                                                                                                        | Collegiality | Stature | Personal Initiative | Personal Experience | Fragmentation | Isolation | Lack of trust/awareness | Inadequate infrastructure/resources |
| <b>High level political will required for all strategies</b>                                                                                                                                           |              |         |                     |                     |               |           |                         |                                     |
| Case documentation and sharing across systems, and in the academic literature                                                                                                                          |              | +       | +                   | +                   |               | +         | +                       |                                     |
| Routine opportunities for interaction and collaboration across systems (eg. health camps, health promotion drives)                                                                                     | +            |         |                     | +                   | +             | +         | +                       | +                                   |
| Routine opportunities for interaction within co-located facilities (eg. staff meetings)                                                                                                                | +            |         |                     | +                   | +             | +         | +                       | +                                   |
| Rewards for integrative initiative of individuals (eg. challenge grants or institutional recognition)                                                                                                  | +            | +       | +                   | +                   |               |           |                         |                                     |
| Rewards for integrative initiative at systems or facility level (eg. Joint targets like no of monthly referrals, no of cases jointly resolved)                                                         |              | +       |                     | +                   | +             | +         | +                       | +                                   |
| Guidelines for collaboration (criteria and conditions for cross-referral, jointly developed by practitioners, non-clinical aspects of work together, including health promotion and managerial duties) |              |         |                     | +                   | +             | +         | +                       | +                                   |

Experiences and meanings of integration

## Acknowledgements

This research was supported by a Wellcome Trust Capacity Strengthening Strategic Award to the Public Health Foundation of India and a consortium of UK universities. We are grateful for the field support of Kaveri Mayra, Candida Thangkhiew, Bobbylin Nadon, Darisuk Kharlyngdoh, Ivanhoe Marak, as well as Sabitha Chandran, and the guidance of Dr. Sandra Albert.

## Contributorship statement

Kabir Sheikh and John Porter made substantial contributions to the conception or design of the work; while Devaki Nambiar, Venkatesh Narayan, JK Lakshmi, and TN Sathyanarayana made substantial contributions to the acquisition. All authors substantially contributed to the analysis, and interpretation of data for the work. With Devaki Nambiar playing a lead, coordinating role in drafting the work, all authors revised it critically for important intellectual content, giving final approval of the version to be published. Further, all authors agree to be accountable for all aspects of the work in ensuring that questions related to the accuracy or integrity of any part of the work are appropriately investigated and resolved.

## Funding

This research was supported by a Wellcome Trust Capacity Strengthening Strategic Award to the Public Health Foundation of India and a consortium of UK universities.

## Competing interests

None to declare.

## Data sharing

No additional data available.

Experiences and meanings of integration

## References

---

<sup>1</sup> World Health Organization. WHO congress on traditional medicine 2008: Beijing declaration.

WHO,2011.

<sup>2</sup> *Resolution of the 62nd World Health Assembly on Traditional Medicine 2009*. EB124.R9. Geneva:

WHA; 2009.

<sup>3</sup> Bodeker G, Kronenberg F. A public health agenda for traditional, complementary, and

alternative medicine. *Am J Public Health* 2002;92:1582–91.

<sup>4</sup> Sheikh K, Nambiar D. Government policies for traditional, complementary and alternative

medical services in India: from assimilation to integration? *Natl Med J India* 2011;24:245–6.

<sup>5</sup> McLeod H, Chung VCH. The Integration of Traditional and Complementary Medicine in

Health Systems. *Presented at the Joint LACA, LAAHS, and PBSS Colloquium*. Hongkong. 2012.

[http://www.actuaries.org/HongKong2012/Presentations/TBR11\\_McLeod.pdf](http://www.actuaries.org/HongKong2012/Presentations/TBR11_McLeod.pdf) (accessed 9 Sep

2013).

<sup>6</sup> Quaiser N. Essentialising the body. Locating medical domination and resistance. *The Newsletter*.

Autumn 2013. [http://www.ias.nl/the-newsletter/article/essentialising-body-locating-medical-](http://www.ias.nl/the-newsletter/article/essentialising-body-locating-medical-domination-and-resistance)

[domination-and-resistance](http://www.ias.nl/the-newsletter/article/essentialising-body-locating-medical-domination-and-resistance) (accessed 21 Jan 2013).

<sup>7</sup> Khan S. Systems of medicine and nationalist discourse in India: Towards “new horizons” in

medical anthropology and history. *SocSci Med*. 2006;62: 2786-97.

<sup>8</sup> World Health Organization. WHO Traditional Medicine Strategy 2002 – 2005. WHO,2002.

<sup>9</sup> Lohokare M, Davar BV. The Community Role of Indigenous Healers. In: Sheikh K, George A

(eds.) *Health Providers in India: On the Frontlines of Change*. New Delhi: Routledge; 2011. p161–81.



Experiences and meanings of integration

---

1  
2  
3  
4  
5  
6  
7  
8  
9  
10  
11  
12  
13  
14  
15  
16  
17  
18  
19  
20  
21  
22  
23  
24  
25  
26  
27  
28  
29  
30  
31  
32  
33  
34  
35  
36  
37  
38  
39  
40  
41  
42  
43  
44  
45  
46  
47  
48  
49  
50  
51  
52  
53  
54  
55  
56  
57  
58  
59  
60

<sup>10</sup> Department of Health and Family Welfare. *Mainstreaming AYUSH under NRHM*.

<http://203.193.146.66/hfw/PDF/ayus.pdf> (accessed 31 Mar 2011).

<sup>11</sup> Department of AYUSH. *AYUSH under NRHM*.

<http://indianmedicine.nic.in/writereaddata/linkimages/4468616884->

[AYUSH%20under%20NRHM.pdf](http://indianmedicine.nic.in/writereaddata/linkimages/4468616884-AYUSH%20under%20NRHM.pdf) (accessed 5 Sep 2013).

<sup>12</sup> Unnikrishnan PM, Kumar LHP, Shankar D. Traditional Orthopaedic Practitioners' Place in Contemporary India: A Case Study from Southern India. In: Sheikh K, George A (eds.) *Health Providers in India: On the Frontlines of Change*. New Delhi: Routledge; 2011. p182–99.

<sup>13</sup> Lakshmi JK. Less equal than others? Experiences of AYUSH medical officers in primary health centres in Andhra Pradesh. *Indian J Med Ethics* 2012;9:18–21.

<sup>14</sup> Priya R, Shweta AS. *Status and Role of AYUSH and Local Health Traditions: Under the National Rural Health Mission, Report of a Study*. National Health Systems Resource Centre. 2010.

<sup>15</sup> Barrett S, Fudge C. *Policy and action: essays on the implementation of public policy*. London: Methuen; 1981.

<sup>16</sup> Walt G, Gilson L. Reforming the health sector in developing countries: the central role of policy analysis. *Health Policy Plan* 1994;9:353–70.

<sup>17</sup> Yanow D. *Conducting Interpretive Policy Analysis*. Newbury Park, CA: Sage; 2000.

<sup>18</sup> Ritchie J, Spencer L. Qualitative Data Analysis for Applied Policy Research. In *Analyzing qualitative data*. London: Routledge; 1994. p173-94.

Experiences and meanings of integration

---

1  
2  
3  
4  
5  
6  
7  
8  
9  
10  
11  
12  
13  
14  
15  
16  
17  
18  
19  
20  
21  
22  
23  
24  
25  
26  
27  
28  
29  
30  
31  
32  
33  
34  
35  
36  
37  
38  
39  
40  
41  
42  
43  
44  
45  
46  
47  
48  
49  
50  
51  
52  
53  
54  
55  
56  
57  
58  
59  
60

<sup>19</sup> Hollenberg D. Uncharted ground: Patterns of professional interaction among complementary/alternative and biomedical practitioners in integrative health care settings. *Soc Sci Med* 2006;62:731-44.

<sup>20</sup> Broom A, Doron A, Tovey P. The inequalities of medical pluralism: Hierarchies of health, the politics of tradition and the economies of care in Indian oncology. *Soc Sci Med* 2009;69:698–706.

<sup>21</sup> Chung VC, Hillier S, Lau CH, et. al. Referral to and attitude towards traditional Chinese medicine amongst western medical doctors in postcolonial Hong Kong. *Soc Sci Med* 2011;72:247-55.

<sup>22</sup> Wangchuk P, Wangchuk D, Aagaard-Hansen J. Traditional Bhutanese medicine (gSo-BA Rig-PA): an integrated part of the formal health care services. *Southeast Asian J Trop Med Public Health* 2007;38:161–7.

<sup>23</sup> Bloom H. *The Lucifer Principle. A Scientific Expedition into the Forces of History*. New York: The Atlantic Monthly Press;1995.

<sup>24</sup> Northridge ME, Mack Jr R. Integrating ethnomedicine into public health. *Am J Public Health* 2002;92:1561-61.

Experiences and meanings of integration

Running Head: Experiences and meanings of integration

Title: Experiences and meanings of integration of TCAM (Traditional, Complementary and Alternative Medical) providers in three Indian states: Results from a cross-sectional, qualitative implementation research study

Authors: D Nambiar,<sup>1</sup> VV Narayan,<sup>2</sup> JK Lakshmi,<sup>3</sup> J Porter,<sup>4</sup> TN Sathyanarayana,<sup>3,5</sup> K Sheikh<sup>4</sup>

1 Public Health Foundation of India, New Delhi, India

2 All India Institute of Medical Sciences, New Delhi, India

3 Indian Institute of Public Health, Hyderabad, India

4 London School of Hygiene and Tropical Medicine, London, United Kingdom

~~5 Indian Institute of Public Health, Hyderabad, Bangalore, India~~

Corresponding Author Information:

Devaki Nambiar, PhD

Research Scientist

Public Health Foundation of India

ISID, 4 Institutional Area

Vasant Kunj 110067

Keywords: Alternative Medicine, Qualitative Evaluation, World Health

Word Count: 3,868868075

1 of 23

Experiences and meanings of integration

## Acknowledgements

This research was supported by a Wellcome Trust Capacity Strengthening Strategic Award to the Public Health Foundation of India and a consortium of UK universities. We are grateful for the field support of Kaveri Mayra, Candida Thangkhiew, Bobbylin Nadon, Darisuk Kharlyngdoh, Ivanhoe Marak, as well as Sabitha Chandran, and the guidance of Dr. Sandra Albert.

## Strengths

- \* Multi-sited qualitative study drawing on meanings and experiences across patients, providers, and health systems administrators
- \* Implementation research using rigorously applied interpretive policy analysis methods
- \* Linked to India's path on Universal Health Coverage

## Limitations

- \* Cross-sectional study, so other than self-report of historical changes, we were not able to chart or map changed views or experiences of participants in vivo.
- \* Focus on the public service delivery sector, even as a great deal of health-seeking takes place in the private sector, with the assumption that public sector strengthening is highly desirable, and possible only through focused study on it.

## Competing Interests

None declared.

Experiences and meanings of integration

### **Contributorship statement**

Kabir Sheikh and John Porter made substantial contributions to the conception or design of the work; while Devaki Nambiar, Venkatesh Narayan, JK Lakshmi, and TN Sathyanarayana made substantial contributions to the acquisition. All authors substantially contributed to the analysis, and interpretation of data for the work. With Devaki Nambiar playing a lead, coordinating role in drafting the work, all authors revised it critically for important intellectual content, giving final approval of the version to be published. Further, all authors agree to be accountable for all aspects of the work in ensuring that questions related to the accuracy or integrity of any part of the work are appropriately investigated and resolved.

### **Competing interests**

None to declare.

### **Funding**

This research was supported by a Wellcome Trust Capacity Strengthening Strategic Award to the Public Health Foundation of India and a consortium of UK universities.

### **Data sharing**

No additional data available.

## Introduction

The 1978 Alma Ata declaration called for traditional medicine, treatments and practices to be “preserved, promoted and communicated widely and appropriately based on the circumstances in each country.” Thirty years later, the 2008 Beijing Declaration on Traditional Medicine called for integration of providers into national health systems, recommending systems of qualification, accreditation, regulation and communication (with allopathic providers).<sup>1</sup> These features of the Beijing Declaration were echoed at the 62<sup>nd</sup> World Health Assembly in 2009, putting out a call to action to United Nations member states to move forward with their plans for integration.<sup>2</sup> The global positioning of Traditional, Complementary, and Alternative Medicine (TCAM) has issued from and tends to imply a central focus on clinical and experimental medicine,<sup>3</sup> yet, recent calls for health systems integration, drawing attention to features like education, accreditation, regulation, and health services provision, ~~place draw greater attention upon to~~ the TCAM health workforce.

In earlier work, we have identified three broad trends of integration as it relates to TCA providers: self-regulation with governmental linkage, government regulation and provisioning, and hybrid/parallel models.<sup>4</sup> This links roughly to the WHO nosology, where three models are identified: “tolerant” systems where the national health care system is based entirely on biomedicine but some TCAM practices are legally permissible, “inclusive” systems where TCAM is recognised but not fully integrated into all aspects of healthcare, and “integrative,” where TCAM is officially recognised in national drug policy, providers and products are registered and regulated, therapies are widely available and covered under insurance schemes, research and education are widely accessible.<sup>5</sup>

The situation on the ground in India, hybrid in our view, seems in parts to reflect tendencies across WHO categories. The dominance of biomedicine appears to be a critical feature of India's

### Experiences and meanings of integration

1  
2  
3 postcolonial health system, even as pre-independence, the TCAM practitioner community had  
4  
5 played a major role in resisting colonial domination in the practice of (bio)medicine.<sup>6</sup> In part as a  
6  
7 response to the reliance on allopathy throughout modern Indian history, there have been strong  
8  
9 arguments in favour of the critical role that non-mainstream practitioners play in offering  
10  
11 accessible, affordable, and socially acceptable health services to populations.Error! Bookmark  
12  
13 not defined.<sup>4,7,8</sup> A study in Maharashtra reported that the situation of traditional healing as a  
14  
15 community function through shared explanatory frameworks across provider and patient are  
16  
17 explicitly unlike typical doctor-patient relationships.<sup>9</sup>

20  
21 In India, one can also find a larger integrative framework, one that mandates “mainstreaming” of  
22  
23 codified TCAM in India, collectively referred to as AYUSH, an acronym for Ayurveda, Yoga &  
24  
25 Naturopathy, Unani, Siddha, Sowa-Rigpa, and Homeopathy. The National Rural Health  
26  
27 Mission (NRHM), launched in 2005 to fortify public health in rural India, took a particular  
28  
29 interest in integrating AYUSH practitioners through facilitation of specialised AYUSH practice,  
30  
31 integration of AYUSH practitioners in national health programmes, integration-incorporation of  
32  
33 AYUSH modalities in primary health care, strengthening the governance of AYUSH practice,  
34  
35 support forforing AYUSH education, establishment of ing laboratories and research facilities for  
36  
37 AYUSH, and providing infrastructural support.<sup>10</sup> Human resource-focused strategies included  
38  
39 contractual appointment of AYUSH doctors in Community and Primary Health Centres,  
40  
41 appointment of paramedics, compounders, data assistants, and managers to support AYUSH  
42  
43 practice, the establishment of specialised therapy centres for AYUSH providers,<sup>11</sup> inclusion of  
44  
45 AYUSH doctors in national disease control programmes; and incorporation of AYUSH drugs  
46  
47 into community health workers’ primary health care kits. A recent report from the AYUSH  
48  
49 department reports that NRHM has established AYUSH facilities in co-location with health  
50  
51 facilities in many Indian states (notably, not in Kerala, where the stand-alone AYUSH facility is  
52  
53 the chosen norm).<sup>1111</sup> As of 2012, more than three quarters of India’s district hospitals, over half

### Experiences and meanings of integration

of its Community Health Centres and over a third of India's Primary Health Centres have AYUSH co-location, serving about 1.77 million, 3.3 million, and 100,000 rural Indians, respectively.<sup>11</sup>

And yet, even this integration framework has at most an "inclusive" character. This is reflected in findings like "official neglect" of traditional orthopaedic practitioners who have no registration, uniformity in inter-state regulation, or institutionalized medical training.<sup>12</sup> AYUSH

doctors contracted to Medical Officer posts in Primary Health Centres (PHCs) in the southern Indian state of Andhra Pradesh report numerous lacunae in the implementation of the mainstreaming initiatives in the National Rural Health Mission (NRHM):<sup>13</sup> job

perquisites~~prerequisites~~ are not indicated, no benefits or allowances provided for health, housing or education, and compensation packages are much lower than those of allopathic doctors.

Support for AYUSH practice is also inadequate (lack of infrastructure, trained assistants, and drug supply) and unethical practices have also been reported (documenting attendance of absentees, and non-cooperation from non-AYUSH personnel ~~refusal to collaborate~~). Evidence from NRHM suggests that reshuffled AYUSH providers practice forms of medicine beyond the scope of their training.<sup>14</sup> Paradoxically, moreover, some Indian states prohibit cross-system prescription, adding ethical dilemmas for TCA practitioners who serve as the only medical practitioner in resource-poor areas.<sup>1444 26</sup>

At a larger scale, current practices of integration (as in NRHM) have been described as substitution and replacement; which tend to ignore the merits of TCAM and present more barriers than facilitators of integration.<sup>77 40</sup> Particularly given the strong push towards co-location and other strategies of integration as part of India's move towards Universal Health Coverage,

~~however,~~ the integration of AYUSH practitioners could result in a doubling of the health workforce. And yet, there are strong fears that such an emphasis on quantitative aspects of integration, i.e. having the right number of practitioners placed at facilities is inadequate. There is



## Experiences and meanings of integration

a need to critically and qualitatively appraise the government infrastructure to support TCA, identify barriers and facilitators to integration that have emerged from this rapid placement of these practitioners, and how these TCA practitioners, allopathic practitioners, and health system actors are reacting and adapting to each.

## Methods

This analysis draws from a larger mixed methods implementation research study aimed at understanding operational and ethical challenges in integration of TCA providers for delivery of essential health services in three Indian states. The study looked at the contents and implementation of TCA provider integration policies in 3 states and at national level examining the understanding and interpretations of integration from the perspectives of different health systems actors. These coupled with their experiences in the actual processes of integration of TCA providers were studied using qualitative interview methods to help identify systemic and ethical challenges. Based on this, the study sought to derive strategies to augment the integration of TCA providers in the delivery of essential health services.

Our study was based on action-centred frameworks<sup>15</sup> with a focus on policy *actors* and *processes*.<sup>16</sup> We have therefore sought to understand the implementation of integration policies empirically. A team of four field researchers was oriented by the principal investigator and advisor to the post-positivist paradigm of research, using Yanow's model of interpretative policy analysis, where the emphasis is equally on describing the experience of policy processes, and on elaborating the meanings actors attach to those processes.<sup>17</sup> The research protocol was approved by the Institutional Ethics Review Board Committee of the Public Health Foundation of India.

Our methods included semi-structured in-depth interviews (see interview guides, Appendix 1) with policymakers (N=12), administrators (N=43), TCAM practitioners, (N=59) ~~and~~ allopathic practitioners (N=37), traditional healers (N=7), as well as health workers and community

### Experiences and meanings of integration

representatives (N=38) in three diverse Indian states (see map, Figure 1). We undertook the study in Kerala, where a number of systems have strong historical and systemic roots (N=74), Meghalaya, where local health traditions hold sway (N=61), and Delhi, where national, state, and municipal jurisdictions interface with multiple systems of medicine (N=61). Participants were selected based upon maximum variation criteria for each category. We sought to represent different schemes, levels of implementation (directorates, zonal officers), systems of medicine, types of establishments (hospital, dispensary), and years of experience.

In each state, one senior researcher, a research associate and a field researcher developed selection matrices to achieve maximum variation across each category of respondents. In each state, two districts were chosen (in the case of Delhi, three municipal zones) that represented variation in accessibility and distribution across TCA providers (eg. small or large proportions of local health practitioners, Homoeopaths~~homeopaths~~Homoeopaths, Ayurvedic and/or Unani practitioners). Publicly available records from state and municipal authorities were consulted in order to determine location and type of facility (co-located, stand-alone) as well as suggestions and recommendations from Key Informants. We also ensured that facilities closest to and furthest from district headquarters were chosen for interviews, to maximise variability. We would typically contact providers via cell phone, share information about the study verbally or via email, and set up a time to interview them. In some cases, we would arrive during out-patient clinic hours to the chosen facility, share our participant information sheet and seek an appointment time with eligible participants. In most cases, we found that participants were keen to participate once they were aware of the nature of the study and, in some cases, the assurance of confidentiality. We had no refusals, although some allopathic practitioners had to be persuaded to participate by emphasizing that this study was not “pro-TCAM integration” per se, but merely seeking to understand state policy implementation. Interviews, ranging from 15 to 90 minutes in length-were undertaken, only always with prior informed consent, and separate consent to

## Experiences and meanings of integration

record interviews. ~~Data were~~ ~~transcribed~~ and stored in password-protected folders and each transcript was checked by investigators for corrections accuracy and quality of transcription.

Textual data from transcripts of interviews as well as notes and observations of facilities and service delivery recorded during fieldwork were analysed through a combination of deductive and inductive techniques in the “framework” approach of qualitative analysis for applied policy research<sup>18</sup> using ATLAS.ti7 software. Themes were developed in three iterations: in the first stage, the lead researcher from each state applied *a priori* codes and closely perused transcripts to devise *emergent* codes, with the support of the ~~Research Associate~~. *A priori* codes were based on our research questions, reflecting experiences, interpretations and meanings of integration (eg. Tc Ap El Adm refers to a TCAM providers’ explanation of experience of interactions with administration in the facility or the health care system). Emergent codes were used to describe the content or categories of these experiences, interpretations and meanings (eg. Em El IndInit refers to personal initiative as a determinant of integration). Researchers coded ~~part~~ 20% of each other’s state datasets to ensure that codes were being applied in a similar, uniform manner. In the second stage, agreement and consolidation of emergent codes across three sites took place under the direction of the study lead; these were then applied to data from each state by its respective lead researcher. Concurrently, lead researchers developed super-codes, or *analytic* codes to group emergent codes (eg. An Ope Adhoc refers to adhocism in policies and practices related to integration). The study lead finalised and then indexed across sites to arrive at results. Emergent and analytic code families were used to develop analyses, involving sharing of data and consultation across sites. ~~We~~ In this paper, we focus on present emergent codes related to experiences and interpretations of integration.

## Results

### Individual experiences and meanings — collaboration and trust

## Experiences and meanings of integration

We found that facilitators of integration emerged from individual and interpersonal relationships, while barriers were identified at the systems level (see Table 1).

### Facilitators at the individual/interpersonal level

#### A) Collegiality between practitioners within facilities

~~Interpersonal collegiality was collaboration and trust appeared to be features of individual and interpersonal relationships across providers and system actors. For instance, many was reported~~ collegiality between and across TCA and allopathic practitioners. In Meghalaya, an allopathic medical officer noted that in some places Ayurvedic and ~~Homoeopathic~~ Homoeopathic doctors were collaborating closely with his colleagues, expressing an interest in learning more about allopathic practices. In the same state, an AYUSH doctor described cordial relations with the administration, such that when medicine stock-outs happened, the allopathic medical officer supplied stop-gap funds to acquire medicines.

#### B) Stature of TCA doctors

Another aspect was the “stature” of individual practitioners. In Kerala, an Ayurvedic practitioner noted that: “Nobody can question ~~MSV~~ <Name of Well Known Ayurvedic Physician from Kerala>. ~~If~~ if he says that taking *chavanaprasham* [health paste] will lead to DNA repair, then nobody can question because they are saying with authority. They are beyond questioning. If somebody else is saying [the same thing,] they will ask, where is the proof?” This was also the case with a private sector entity that had opened a branch in Delhi. Practitioners in this institution ~~had a high~~ were highly reputed, involved with transnational research collaborations, and reported numerous cross-reputation and enjoyed collegiality referrals from with allopathic providers across the city , but this could not be generalised to the system of medicine in general.

#### C) Personal initiative of TCA doctors

## Experiences and meanings of integration

Political will of highly networked individuals and/or individual access to top decision makers also facilitated integration. In fact, one of the health system actors had participated in high level negotiations with political leaders in the country to get the AYUSH department formed (formerly the Indian Systems of Medicine & Homoeopathy department) in 1995 — which in many ways marks a critical step in the attention given to integration in the health system. Within the state of Delhi, furthermore, it was the demand articulated by city councillors and ward leaders that resulted in the construction of dispensaries and AYUSH wards in hospitals, so much so that this was considered a norm. In Meghalaya, an AYUSH doctor described cordial relations with the administration, such that when medicine stock-outs happened, this the allopathic medical officer supplied stop-gap funds to acquire medicines.

Many of the participants we spoke to in Delhi were familiar with each other — these personal relationships and interactions, more often than official platforms, were the basis for interaction, cross-referral, collective planning and advocacy, and in rarer cases, collaborative research. Across states, we heard of individual TCA practitioners exercising personal initiative to hasten improvements in infrastructure and with the Public Works Department and service delivery.

Following is an excerpt of an interview with an Ayurvedic doctor from a Delhi hospital:

“ThereTthere is a lack of storage space so the diagnosis room is being used for some storage.

But I have been treating people in the Public Works Department and then it is getting

resolved!””; Many of the participants we spoke to in many states were familiar with each other —

these personal relationships and interactions, in the absence of official or regular platforms, were

the basis for interaction, cross-referral, collective planning and advocacy, and in rarer cases,

collaborative research. to increase the visibility of their practice in the facility with their

superintendents, and so on.

### D) Personal experience of allopaths

### Experiences and meanings of integration

Personal experience across systems also helped built trust. In Kerala, an allopath indicated that his own mother-in-law was under Ayurvedic treatment for chronic illness and that she and others he knew were “getting good relief.” He noted that Ayurveda was trustworthy based on this experience. As an Ayurvedic practitioner in Delhi put it, “if one takes a personal interest, there can be a little something.” ~~Indeed for this practitioner, success was measured in much humbler “little somethings” given the larger systemic constraints in the way of integration. But everyone is busy in their own work. If it is done officially – like in a month, every 2nd Saturday ... Then it will happen more systematically.”~~

#### E) Political will of senior health system actors

~~Systems level integration was facilitated by highly networked individuals and/or individual access to top decision-makers. One of the health system actors we interviewed had participated in high level negotiations with political leaders in the country to get the AYUSH department formed (formerly the Indian Systems of Medicine & Homoeopathy department) in 1995 – which in many ways marks a critical step in the attention given to integration in the health system. Within the state of Delhi, furthermore, it was the demand articulated by city councillors and ward leaders that resulted in the construction of dispensaries and AYUSH wards in hospitals, so much so that this was considered a norm.~~

#### Barriers at the system level

##### A) Fragmentation of jurisdictions and facilities

###### Group or system-linked experiences and meanings – distrust and fragmentation

~~It was clear that systematic integration was not widely perceived in any of the facilities or states studied. For one, all states had not a single unified system, but rather multiple systems with~~

## Experiences and meanings of integration

parallel governance apparatuses, each with their own challenges. In fact, in Delhi, ~~In Delhi,~~ integration was constrained in the system by the fragmentation of jurisdictions and facilities, but also with respect to how providers were posted at facilities. In this state, co-location did take place, but involved an individual TCA practitioner co-located at multiple sites, while multiple allopaths served at a single site (the biomedical norm). Allopaths had more opportunities, in terms of sheer numbers of people, availability of space and time, to communicate with each other.

### ***B) Inter-system isolation and lack of communication***

Given the aforementioned lack of people, space and time, allopaths were socially isolated from, and had fewer chances to communicate with TCA providers or TCA providers with each other. In Kerala, the limitations on communication were shaped in particular by the fact that facilities tended to be stand-alone. In Meghalaya, an Ayurveda doctor stated, simply, “I am doing my work, that is completely asocial type, separated, segregated.” There was almost no communication between local health practitioners and others – whether AYUSH or allopath simply because of a lack of systemic acknowledgement and legitimacy given to this workforce. This doctor went on: “very few people listen to our problem. Because, we are still, again, you know, under the general allopathic doctor, ...so when we post our problem you know, hardly like, they table that problem...”

### ***C) Lack of trust and awareness of TCA systems***

When speaking about providers as a cadre, ~~or~~ group or ~~of~~ systems in general, we noted that ~~difference and~~ distrust tended to be highlighted. In Meghalaya, an allopath opined “Please, if you want us to work in a normal way, you know, peacefully, just have these people removed.” A similar sentiment was expressed by a senior Unani hospital practitioner in Delhi, “We can interact as a *pathy* but our basic concepts do not match. We can’t help each other in any way. They are independent, we are independent.” There was limited value, in the view of this

## Experiences and meanings of integration

practitioner, in engaging with other systems of medicine. ~~Among older generations of practitioners, relationships were more fraught, and characterised by inter-system tensions.~~ An allopath in Kerala described at length how allopathic doctors had protested vehemently – and successfully – against a government policy ~~posting~~ of Ayurveda doctors getting house surgeon postings in the state. ~~More~~In contrast, other, usually more~~More~~ junior practitioners noted that even with respect to TCAM systems: “We three [Ayurveda, Unani, and Homoeopathy] are together here, but cross-reference is very, very less... We don’t know what is the strong point of Ayurveda, Unani. Allopath will not know the strong point of Homoeopathy, Ayurveda. They just say ‘skin!’ – that’s all they know!”, had a high demand for inter and intra-system interaction including but also beyond the official framework of workshops, chances to “sit and talk” about benefits, collaborative research ideas, and so on.

### *D) Inadequate infrastructure and resources for TCA service delivery*

~~In addition, we observed limited formal communication across systems of medicine. As pointed out by a health system actor: “Doctors generally don’t have meetings but just like that when they sit on the table, talk, so then such conversations happen.”~~

~~In Delhi, chances for such interaction were constrained in the system by the fragmentation of jurisdictions and facilities, but also with respect to how providers were posted at facilities. In this state, co-location did take place, but involved an individual TCA practitioner co-located at multiple sites, while multiple allopaths served at a single site (the biomedical norm). Allopaths had more opportunities, in sheer numbers of people, availability of space and time, to communicate with each other. Given the commensurate lack of people, space and time, allopaths had fewer chances to communicate with TCA providers or TCA providers with each other. In Kerala, the limitations on communication were shaped in particular by the fact that facilities tended to be stand-alone. In Meghalaya, an Ayurveda doctor stated, simply, “I am doing my work, that is completely asocial type, separated, segregated.” There was almost no~~



### Experiences and meanings of integration

~~communication between local health practitioners and others — whether AYUSH or allopath simply because of a lack of systemic acknowledgement and legitimacy given to this workforce. This doctor went on: “very few people that listen to our problem. Because, we are still again you know under the general allopathic doctor, no, like our SS, DMHO even the directorate, at the directorate level, the director so when we post our problem you know, hardly like, they table that problem...”~~

Opportunities to interact were further constrained by the ~~In addition, as a cadre, AYUSH practitioners had also to contend with dissonance between their expectations and system~~ design of service delivery. We observed in many dispensaries and hospitals in Delhi that non-allopathic practitioners were assigned rooms on the top floor of the facility, while allopaths were allocated multiple rooms on the ground floor (Fieldnotes June 11<sup>th</sup>, 20<sup>th</sup>, 21<sup>st</sup>, 22<sup>nd</sup>, and 27<sup>th</sup> 2012). And, most commonly, the kinds of cases that they were handling included orthopaedic ailments, and other conditions (motor, neurological, gastric) that constrained mobility and created a very real barrier of access to care within a health care facility for patients. Practitioners therefore spend much of their time responding to these inadequacies.

~~There~~ There was also a mismatch in the expectation and provision were also shortcomings in the design of diagnostic services, and inadequacy of human resources. Both

Homoeopathic ~~Homoeopathic~~ and Ayurvedic practitioners in Kerala noted the recourse to outsourcing diagnostic investigations because of the lack of facilities in their institutions. Further, there was reliance upon contractual recruitment of human resources to address shortages, which affected the stability and reliability of service delivery, in their view. When we asked an administrator of one of Delhi’s newest, state-of-the-art Ayurvedic facilities what kind of coordination occurred across departments as part of the hospital’s functioning, he shrugged and replied, “Nothing as such!”

~~Experiences and meanings of integration~~

## Discussion

Most striking in our findings is the emergence of individual experiences and interpretations as enablers or facilitators of ~~integrationconvergenceintegration~~, in the form of collegiality, recognition of stature, exercise of ~~individual personal initiative among TCA practitioners and of personal experience of TCAM among allopaths. agency and cross-referral. These individual efforts were premised on trust and dialogue.~~ In contrast, ~~barriers to integration seemed to exist at a systems level. They included distrust, poor design and fragmentation of jurisdiction and facilities, inter-system isolation, lack of trust in and awareness of TCA systems, and inadequate infrastructure and resources for TCA service delivery.~~ ~~delivery at the systems level appears to be a barrier to integrative efforts.~~ It is a system where “little somethings” of individuals that catalyse integration are met with “nothing as such” at the systems level.

Some of our findings are not new – the experience of lack of interaction has emerged in Hollenberg’s study on an integrated practice, which reported that weekly doctors’ meetings included only biomedical doctors, not CAM.<sup>19</sup> This study also reported the “geographical dominance” of biomedical doctors in terms of location of consulting rooms, as was found in our study. A study by Broom and colleagues found tension ~~and, mistrust, and dichotomy (rational/irrational, physical/metaphysical, traditional/modern)~~, as well as ~~some~~ inconsistencies in practice; and ~~stated~~ values ~~related to, regarding~~ biomedicine and TCAM, among Indian oncologists.<sup>20</sup> Such challenges were also seen in our study.

Our study also revealed some unique findings with respect to the extant literature. Chung et al, attributed low referral from biomedicine to TCAM in Hong Kong to the lack of articulated and enforced procedures of referral in an integrated medical establishment.<sup>21</sup> In the Indian case, it appears that the vagueness of process both allows ad hoc interactions and referrals based on personal rapport and at the same time discourages the kind of predictable, routine interactions that would allow such rapport to be built. Speaking of integration of Sowa-Rigpa in Bhutan since

16 of 23

### Experiences and meanings of integration

1  
2  
3 1967, Wangchuk and colleagues suggest that there are managerial lessons offered by the  
4  
5 juxtaposition and collaboration of conceptually distinct systems within a single administrative  
6  
7 and policy unit, such as a ministry.<sup>22</sup>In effect, as they point out, services may not be co-located,  
8  
9 but their administration necessarily will-should be. One could argue that India's case is different  
10  
11 – whether in facilities or administratively, it is not just two systems, but more like eight (across  
12  
13 AYUSH systems), that are to be integrated, introducing internal hierarchies and complexities that  
14  
15 are unique to the countrycountryand interlinked.

16  
17  
18  
19 In the 1990s and early 2000s, it was argued that integration is about a “battle between two  
20  
21 scientific truths,”<sup>23</sup> or that the CAM field creates two tendencies: “uninformed skeptics who  
22  
23 don't believe in anything, and uncritical enthusiasts who don't care about data.”<sup>24</sup> Analysis of  
24  
25 service delivery in India over a decade later suggests that there are multiple battles being fought –  
26  
27 epistemological, logistical, ethical, and operational across systems, with (re)conciliatory  
28  
29 intercession, at times, of individuals.

30  
31  
32  
33 How can such intercessions be encouraged, catalyzed even? We offer a few suggestions for  
34  
35 activities in the Indian case that leverage the individual facilitators of integration to fill systemic  
36  
37 gaps (see Table 2). These strategies are based on the aforementioned findings in particular states;  
38  
39 their 'translate-ability' to other states would have to be examined.

40  
41  
42 For one, improved documentation of clinical cases across systems could be undertaken and  
43  
44 shared. We noted that those AYUSH practitioners who were documenting their practices had  
45  
46 greater stature, opportunities and topics for interaction with peers. Drawing upon personal  
47  
48 initiative and creating experiences of interaction, this could help raise the stature of TCA  
49  
50 practice, while also reducing isolation and lack of awareness. State health departments could  
51  
52 create routine opportunities for interaction and collaboration across systems, and within  
53  
54 facilities. In Delhi, polio immunization has served as an integrative platform for many  
55  
56 practitioners to work together and develop trust and ties. Within facilities, joint staff meetings  
57  
58

59  
60 17\_of\_23

## Experiences and meanings of integration

may serve a similar purpose. Authorities may also consider rewarding individual initiatives for integration (through challenge grants or institutional recognition) - these could be designed to address system-level barriers to integration. Systems-integration could also be rewarded, through joint or synergistically achieved targets for referrals, or number of patients cared for using complementary or adjuvant therapies. As of now, those reporting cross-referrals only know of each other; if targets were set, there would be greater incentives for and attention to conditions and protocols for cross-referral. Many practitioners we spoke to suggested that guidelines for collaboration (including cross-referral) be created. We feel this itself could be a starting point of collaboration amongst TCA providers and with allopathic providers. In each state, the feasibility of each of these strategies would have to be determined, and given due attention through the exertions of powerful stakeholders with political will, who at various points, may find themselves battling each other over policies or power.

## Conclusion

Battles occur between armies, while acts of diplomacy involve intricate latticework relationships individuals with overlapping needs and interests. Our research across three very different Indian states – Kerala, Meghalaya and Delhi - suggests that strategies that attempt to make the health systems ~~isomorphic or~~ receptive to individual integrative efforts may facilitate integration across systems, creating opportunities for greater collaboration, and trust. ~~The~~ We have proposed strategies to this end, ~~which must in turn be additionally~~ ~~will accordingly need to be individually~~ tailored ~~to and carefully devised~~ to each state context, so that ~~the health system exists in a vibrant~~ ~~but also coherent plurality of the system is both more receptive to and reflective of, integrative~~ human agency.

Experiences and meanings of integration

**Tables****Table 1. Summary of Findings**

|                            | <u>Factors at Individual/Interpersonal Level</u>                                                                                                                                                                                                            |                        | <u>Factors at Group/System Level</u>                                                                                                                                                                                                                       |
|----------------------------|-------------------------------------------------------------------------------------------------------------------------------------------------------------------------------------------------------------------------------------------------------------|------------------------|------------------------------------------------------------------------------------------------------------------------------------------------------------------------------------------------------------------------------------------------------------|
| <b><u>FACILITATORS</u></b> | A) <u>Collegiality</u> between practitioners within facilities<br>B) <u>Stature</u> of TCA doctors<br>C) <u>Personal initiative</u> of TCA doctors<br>D) <u>Personal experience</u> of allopaths<br>E) <u>Political will</u> of senior health system actors | <b><u>BARRIERS</u></b> | A) <u>Fragmentation</u> of jurisdiction and facilities<br>B) <u>Inter-system isolation</u> and lack of communication<br>C) <u>Lack of trust and awareness</u> of TCA systems<br>D) <u>Inadequate infrastructure and resources</u> for TCA service delivery |

Experiences and meanings of integration

**Table 2. Recommendations to promote/address Integration, responding to findings**

| <b>Strategies to promote TCA integration for essential health services delivery, based on our findings</b>                                                                                                    | <b>FACILITATORS</b> |                |                            |                            | <b>BARRIERS</b>      |                  |                                |                                            |
|---------------------------------------------------------------------------------------------------------------------------------------------------------------------------------------------------------------|---------------------|----------------|----------------------------|----------------------------|----------------------|------------------|--------------------------------|--------------------------------------------|
|                                                                                                                                                                                                               | <b>Collegiality</b> | <b>Stature</b> | <b>Personal Initiative</b> | <b>Personal Experience</b> | <b>Fragmentation</b> | <b>Isolation</b> | <b>Lack of trust/awareness</b> | <b>Inadequate infrastructure/resources</b> |
| <b>High level political will required for all strategies</b>                                                                                                                                                  |                     |                |                            |                            |                      |                  |                                |                                            |
| <u>Case documentation and sharing across systems, and in the academic literature</u>                                                                                                                          |                     | ±              | ±                          | ±                          |                      | ±                | ±                              |                                            |
| <u>Routine opportunities for interaction and collaboration across systems (eg. health camps, health promotion drives)</u>                                                                                     | ±                   |                |                            | ±                          | ±                    | ±                | ±                              | ±                                          |
| <u>Routine opportunities for interaction within co-located facilities (eg. staff meetings)</u>                                                                                                                | ±                   |                |                            | ±                          | ±                    | ±                | ±                              | ±                                          |
| <u>Rewards for integrative initiative of individuals (eg. challenge grants or institutional recognition)</u>                                                                                                  | ±                   | ±              | ±                          | ±                          |                      |                  |                                |                                            |
| <u>Rewards for integrative initiative at systems or facility level (eg. Joint targets like no of monthly referrals, no of cases jointly resolved)</u>                                                         |                     | ±              |                            | ±                          | ±                    | ±                | ±                              | ±                                          |
| <u>Guidelines for collaboration (criteria and conditions for cross-referral, jointly developed by practitioners, non-clinical aspects of work together, including health promotion and managerial duties)</u> |                     |                |                            | ±                          | ±                    | ±                | ±                              | ±                                          |

## References

---

<sup>1</sup> World Health Organization. WHO congress on traditional medicine 2008: Beijing declaration. WHO, 2011.

<sup>2</sup> *Resolution of the 62nd World Health Assembly on Traditional Medicine 2009*. EB124.R9. Geneva: WHA; 2009.

<sup>3</sup> Bodeker G, Kronenberg F. A public health agenda for traditional, complementary, and alternative medicine. *Am J Public Health* 2002;92:1582–91.

<sup>4</sup> Sheikh K, Nambiar D. Government policies for traditional, complementary and alternative medical services in India: from assimilation to integration? *Natl Med J India* 2011;24:245–6.

<sup>5</sup> McLeod H, Chung VCH. The Integration of Traditional and Complementary Medicine in Health Systems. *Presented at the Joint LACA, LAAHS, and PBSS Colloquium*. Hongkong. 2012. [http://www.actuaries.org/HongKong2012/Presentations/TBR11\\_McLeod.pdf](http://www.actuaries.org/HongKong2012/Presentations/TBR11_McLeod.pdf) (accessed 9 Sep 2013).

<sup>6</sup> Quaiser N. Essentialising the body. Locating medical domination and resistance. *The Newsletter*. Autumn 2013. <http://www.ias.nl/the-newsletter/article/essentialising-body-locating-medical-domination-and-resistance> (accessed 21 Jan 2013).

<sup>7</sup> Khan S. Systems of medicine and nationalist discourse in India: Towards “new horizons” in medical anthropology and history. *SocSci Med*. 2006;62: 2786-97.

<sup>8</sup> World Health Organization. WHO Traditional Medicine Strategy 2002 – 2005. WHO, 2002.

<sup>9</sup> Lohokare M, Davar BV. The Community Role of Indigenous Healers. In: Sheikh K, George A (eds.) *Health Providers in India: On the Frontlines of Change*. New Delhi: Routledge; 2011. p161–81.

<sup>10</sup> Department of Health and Family Welfare. *Mainstreaming AYUSH under NRHM*.

<http://203.193.146.66/hfw/PDF/ayus.pdf> (accessed 31 Mar 2011).

<sup>11</sup> Department of AYUSH. *AYUSH under NRHM*.

<http://indianmedicine.nic.in/writereaddata/linkimages/4468616884->

[AYUSH%20under%20NRHM.pdf](http://indianmedicine.nic.in/writereaddata/linkimages/4468616884-AYUSH%20under%20NRHM.pdf) (accessed 5 Sep 2013).

<sup>12</sup> Unnikrishnan PM, Kumar LHP, Shankar D. Traditional Orthopaedic Practitioners' Place in Contemporary India: A Case Study from Southern India. In: Sheikh K, George A (eds.) *Health Providers in India: On the Frontlines of Change*. New Delhi: Routledge; 2011. p182–99.

<sup>13</sup> Lakshmi JK. Less equal than others? Experiences of AYUSH medical officers in primary health centres in Andhra Pradesh. *Indian J Med Ethics* 2012;9:18–21.

<sup>14</sup> Priya R, Shweta AS. *Status and Role of AYUSH and Local Health Traditions: Under the National Rural Health Mission, Report of a Study*. National Health Systems Resource Centre. 2010.

<sup>15</sup> Barrett S, Fudge C. *Policy and action: essays on the implementation of public policy*. London: Methuen; 1981.

<sup>16</sup> Walt G, Gilson L. Reforming the health sector in developing countries: the central role of policy analysis. *Health Policy Plan* 1994;9:353–70.

<sup>17</sup> Yanow D. *Conducting Interpretive Policy Analysis*. Newbury Park, CA: Sage; 2000.

<sup>18</sup> Ritchie J, Spencer L. Qualitative Data Analysis for Applied Policy Research. In *Analyzing qualitative data*. London: Routledge; 1994. p173-94.



Experiences and meanings of integration

<sup>19</sup> Hollenberg D. Uncharted ground: Patterns of professional interaction among complementary/alternative and biomedical practitioners in integrative health care settings. *Soc Sci Med* 2006;62:731-44.

<sup>20</sup> Broom A, Doron A, Tovey P. The inequalities of medical pluralism: Hierarchies of health, the politics of tradition and the economies of care in Indian oncology. *Soc Sci Med* 2009;69:698–706.

<sup>21</sup> Chung VC, Hillier S, Lau CH, Wong S, Yeoh EK, Griffiths SM. Referral to and attitude towards traditional Chinese medicine amongst western medical doctors in postcolonial Hong Kong. *Soc Sci Med* 2011;72:247-55.

<sup>22</sup> Wangchuk P, Wangchuk D, Aagaard-Hansen J. Traditional Bhutanese medicine (gSo-BA Rig-PA): an integrated part of the formal health care services. *Southeast Asian J Trop Med Public Health* 2007;38:161–7.

<sup>23</sup> Bloom H. *The Lucifer Principle. A Scientific Expedition into the Forces of History*. New York: The Atlantic Monthly Press;1995.

<sup>24</sup> Northridge ME, Mack Jr R. Integrating ethnomedicine into public health. *Am J Public Health* 2002;92:1561-61.

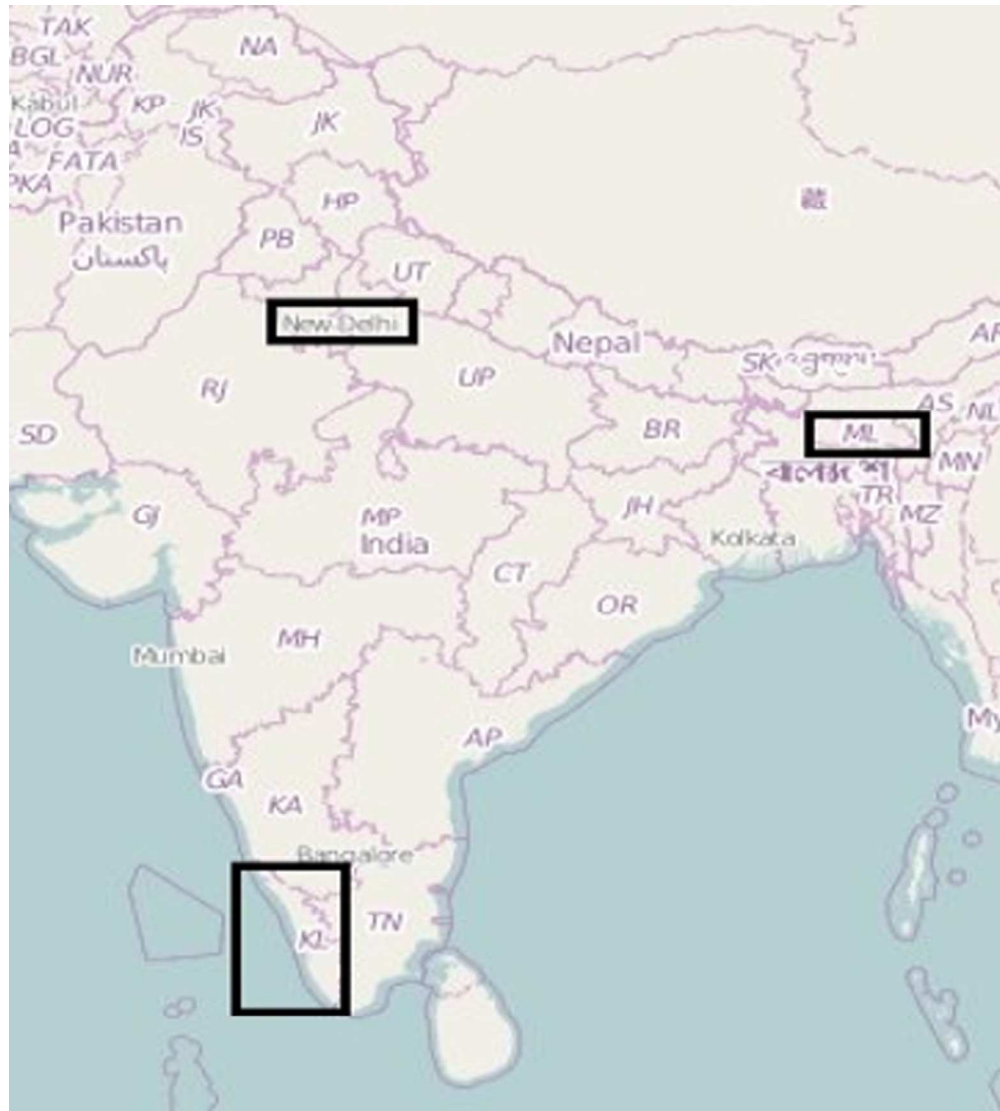

Figure 1. Location of states in India where fieldwork was conducted (New Delhi, Meghalaya (ML), and Kerala (KL))  
251x279mm (300 x 300 DPI)

TOPIC GUIDE: KEY INFORMANTS

*(Policy elites, representatives of TCAM and allopathic associations, CBO representatives, representatives of technical organizations)*

1. Reasons for involving TCAM providers in essential health services (AYUSH and non-AYUSH)
2. Roles of TCAM providers in health services (AYUSH and non-AYUSH)
3. Existing policies and strategies for TCAM integration (AYUSH and non-AYUSH)
4. Status and extent of implementation of above policies and strategies
5. Obstacles to implementation at different levels
6. Social and cultural contexts and factors promoting and impeding integration
7. Position and role(s) of respective organization in promoting / facilitating / opposing TCAM integration

TOPIC GUIDE: HEALTH SYSTEMS ACTORS

*(Public sector health planners, administrators)*

1. Personal designation and role within the organization/department
2. Role and functions of organization/department
3. Designated functions of the organization/department in involving TCAM providers in service delivery
4. Organizational arrangements for performing each of these functions
5. Experiences of executing each of these functions (probe: explanations)
6. Shortfalls and obstacles in executing each function (probe: explanations)
7. Interactions with other organizations / departments in process of involving TCAM
8. Reasons for involving TCAM providers in health care system (AYUSH and non-AYUSH)
9. Roles of TCAM providers in health care system (AYUSH and non-AYUSH)
10. How is people's health care access affected as a result of TCAM involvement?
11. How is the quality of care provided by TCAM providers affected by their involvement?
12. How is the development of TCAM systems of medicine affected by their involvement?
13. Perceptions about value and utility of TCAM systems of medicine (AYUSH and non-AYUSH)
14. Opportunities to strengthen role of organization/department in working with TCAM

TOPIC GUIDE: TCAM

*(TCAM practitioners working in public sector health services)*

1. Your role in health care system (AYUSH and non-AYUSH)
2. Experiences of interface with administration (probe: explanations)
3. Experiences of interface with facility support staff (probe: explanations)
4. Experiences of interface with users of care and community (probe: explanations)
5. Experiences of working with allopathic providers
6. Experiences demonstrating benefits and advantages (probe: explanations)
7. Experiences demonstrating detriments and disadvantages (probe: explanations)
8. Experiences of interface with other TCAM providers [A,U,H and non-AYUSH] (probe: explanations)
9. How has the quality of care you provide been affected by involvement in health services?
10. How is the development of TCAM systems of medicine affected by involvement in health services?

TOPIC GUIDE: ALLOPATHIC DOCTORS

*(Allopathic doctors working with TCAM practitioners)*

1. Reasons for involving TCAM providers in health care system (AYUSH and non-AYUSH)
2. Roles of TCAM providers in health care system (AYUSH and non-AYUSH)
3. Experiences of working with TCAM providers
4. Impact of involvement of TCAM providers on facility performance (probe: explanations)
5. Experiences demonstrating benefits and advantages (probe: explanations)
6. Experiences demonstrating detriments and disadvantages (probe: explanations)
7. How is people's health care access affected as a result of TCAM involvement?
8. How is the quality of care provided by TCAM providers affected by their involvement?
9. How is the development of TCAM systems of medicine affected by their involvement?
10. Perceptions about value and utility of TCAM systems of medicine (AYUSH and non-AYUSH)

TOPIC GUIDE: COMMUNITY REPRESENTATIVES

*(CBO, Consumer, MBP, PRI representatives)*

1. Experience of receiving care from TCAM providers
2. Experience of receiving care from Allopathic providers
3. Experience of receiving care in co-located facilities following integration
4. How is utilization of health services affected as a result of TCAM involvement? Why?
5. Has there been any change in the quality of care in health facilities, following involvement of TCAM providers? How so?
6. Perceptions about value and utility of TCAM systems of medicine (AYUSH and non-

# BMJ Open

## Experiences and meanings of integration of TCAM (Traditional, Complementary and Alternative Medical) providers in three Indian states: Results from a cross- sectional, qualitative implementation research study

|                                 |                                                                                                                                                                                                                                                                                                                                                                                                                                 |
|---------------------------------|---------------------------------------------------------------------------------------------------------------------------------------------------------------------------------------------------------------------------------------------------------------------------------------------------------------------------------------------------------------------------------------------------------------------------------|
| Journal:                        | <i>BMJ Open</i>                                                                                                                                                                                                                                                                                                                                                                                                                 |
| Manuscript ID:                  | bmjopen-2014-005203.R2                                                                                                                                                                                                                                                                                                                                                                                                          |
| Article Type:                   | Research                                                                                                                                                                                                                                                                                                                                                                                                                        |
| Date Submitted by the Author:   | 02-Sep-2014                                                                                                                                                                                                                                                                                                                                                                                                                     |
| Complete List of Authors:       | Nambiar, Devaki; Public Health Foundation of India, Narayan, Venkatesh; All India Institute of Medical Sciences, Lakshmi, JK; Indian Institute of Public Health - Hyderabad, Porter, John; London School of Hygiene & Tropical Medicine, Department of Clinical Research Sathyanarayana, TN; Indian Institute of Public Health-Bangalore Campus, Health Policy and Management Sheikh, Kabir; Public Health Foundation of India, |
| <b>Primary Subject Heading</b>: | Health services research                                                                                                                                                                                                                                                                                                                                                                                                        |
| Secondary Subject Heading:      | Global health, Qualitative research                                                                                                                                                                                                                                                                                                                                                                                             |
| Keywords:                       | COMPLEMENTARY MEDICINE, International health services < HEALTH SERVICES ADMINISTRATION & MANAGEMENT, QUALITATIVE RESEARCH                                                                                                                                                                                                                                                                                                       |
|                                 |                                                                                                                                                                                                                                                                                                                                                                                                                                 |

SCHOLARONE™  
Manuscripts

only

Experiences and meanings of integration

Running Head: Experiences and meanings of integration

Title: Experiences and meanings of integration of TCAM (Traditional, Complementary and Alternative Medical) providers in three Indian states: Results from a cross-sectional, qualitative implementation research study

Authors: D Nambiar,<sup>1</sup> VV Narayan,<sup>2</sup> JK Lakshmi,<sup>3</sup> JDH Porter,<sup>4</sup> TN Sathyanarayana,<sup>3</sup> K Sheikh<sup>4</sup>

1 Public Health Foundation of India, New Delhi, India

2 All India Institute of Medical Sciences, New Delhi, India

3 Indian Institute of Public Health, Hyderabad, India

4 London School of Hygiene and Tropical Medicine, London, United Kingdom

Corresponding Author Information:

Devaki Nambiar, PhD

Research Scientist

Public Health Foundation of India

ISID, 4 Institutional Area

Vasant Kunj 110067

Keywords: Alternative Medicine, Qualitative Evaluation, World Health

Word Count: 3,868

Experiences and meanings of integration

## Abstract

Objectives: Efforts to engage Traditional Complementary and Alternative Medical (TCAM) practitioners in the public health workforce have growing relevance for India's path to universal health coverage. We used an action-centred framework to understand how policy prescriptions related to integration were being implemented in three distinct Indian states.

Setting: Health departments and district-level primary care facilities in the states of Kerala, Meghalaya, and Delhi.

Participants: In each state, two or three districts were chosen that represented variation in accessibility and distribution across TCAM providers (e.g., small or large proportions of local health practitioners, Homoeopaths, Ayurvedic and/or Unani practitioners). Per district, two blocks or geographical units were selected. TCAM and allopathic practitioners, administrators and representatives of community at district and state levels were chosen based on publicly available records from state and municipal authorities. A total of 196 interviews were carried out: 74 in Kerala, and 61 each in Delhi and Meghalaya.

Primary and secondary outcome measures: We sought to understand experiences and meanings associated with integration across stakeholders, as well as barriers and facilitators to implementing policies related to integration of TCA providers at the systems level.

Experiences and meanings of integration

Results: We found that individual and interpersonal attributes tended to facilitate integration, while system features and processes tended to hinder it. Collegiality, recognition of stature, exercise of individual personal initiative among TCA practitioners and of personal experience of TCAM among allopaths enabled integration. The system was characterised, on the other hand, by fragmentation of jurisdiction and facilities, inter-system isolation, lack of trust in and awareness of TCA systems, and inadequate infrastructure and resources for TCA service delivery.

Conclusions: State-tailored strategies that routinise interaction, reward individual and system-level individual integrative efforts, fostered by high level political will are recommended.

Experiences and meanings of integration

## Strengths

\* Multi-sited qualitative study drawing on meanings and experiences across patients, providers, and health systems administrators

\* Implementation research using rigorously applied interpretive policy analysis methods

\* Linked to India's path to Universal Health Coverage

## Limitations

\* Cross-sectional study, so other than self-report of historical changes, we were not able to chart or map changed views or experiences of participants in vivo

\* Focus on the public service delivery sector, even as a great deal of health-seeking takes place in the private sector, with the assumption that public sector strengthening is highly desirable, and possible only through focused study on it



Experiences and meanings of integration

## Introduction

The 1978 Alma Ata declaration called for traditional medicine treatments and practices to be “preserved, promoted and communicated widely and appropriately based on the circumstances in each country.” Thirty years later, the 2008 Beijing Declaration on Traditional Medicine called for integration of providers into national health systems, recommending systems of qualification, accreditation, regulation and communication (with allopathic providers).<sup>1</sup> These features of the Beijing Declaration were echoed at the 62<sup>nd</sup> World Health Assembly in 2009, putting out a call to action to United Nations member states to move forward with their plans for integration.<sup>2</sup> The global positioning of Traditional, Complementary, and Alternative Medicine (TCAM) has issued from and tends to imply a central focus on clinical and experimental medicine,<sup>3</sup> yet, recent calls for health systems integration, draw attention to features like education, accreditation, regulation, and health services provision, and the TCAM health workforce itself.

In earlier work, we have identified three broad trends of integration as it relates to TCA providers: self-regulation with governmental linkage, government regulation and provisioning, and hybrid/parallel models.<sup>4</sup> This links roughly to the WHO nosology, where three models are identified: “tolerant” systems where the national health care system is based entirely on biomedicine but some TCAM practices are legally permissible, “inclusive” systems where TCAM is recognised but not fully integrated into all aspects of healthcare, and “integrative,” where TCAM is officially recognised in national drug policy, providers and products are registered and regulated, therapies are widely available and covered under insurance schemes, research and education are widely accessible.<sup>5</sup>

The situation on the ground in India, hybrid in our view, seems in parts to reflect tendencies across WHO categories. The dominance of biomedicine appears to be a critical feature of India’s postcolonial health system, even as pre-independence, the TCAM practitioner community had

Experiences and meanings of integration

played a major role in resisting colonial domination in the practice of (bio)medicine.<sup>6</sup> In part as a response to the reliance on allopathy throughout modern Indian history, there have been strong arguments in favour of the critical role that non-mainstream practitioners play in offering accessible, affordable, and socially acceptable health services to populations.**Error! Bookmark not defined.**<sup>7,8</sup> A study in Maharashtra reported that the situation of traditional healing as a community function through shared explanatory frameworks across provider and patient are explicitly unlike typical doctor-patient relationships.<sup>9</sup>

In India, one can also find a larger integrative framework, one that mandates “mainstreaming” of codified TCAM in India, collectively referred to as AYUSH, an acronym for Ayurveda, Yoga & Naturopathy, Unani, Siddha, Sowa-Rigpa, and Homoeopathy. The National Rural Health Mission (NRHM), launched in 2005 to fortify public health in rural India, took a particular interest in integrating AYUSH practitioners through facilitation of specialised AYUSH practice, integration of AYUSH practitioners in national health programmes, incorporation of AYUSH modalities in primary health care, strengthening the governance of AYUSH practice, support for AYUSH education, establishment of laboratories and research facilities for AYUSH, and providing infrastructural support.<sup>10</sup> Human resource-focused strategies included contractual appointment of AYUSH doctors in Community and Primary Health Centres, appointment of paramedics, compounders, data assistants, and managers to support AYUSH practice, establishment of specialised therapy centres for AYUSH providers, inclusion of AYUSH doctors in national disease control programmes; and incorporation of AYUSH drugs into community health workers’ primary health care kits. A recent report from the AYUSH department reports that NRHM has established AYUSH facilities in co-location with health facilities in many Indian states (notably, not in Kerala, where the stand-alone AYUSH facility is the chosen norm).<sup>11</sup> As of 2012, more than three quarters of India’s district hospitals, over half of its Community Health

Experiences and meanings of integration

Centres and over a third of India's Primary Health Centres have AYUSH co-location, serving about 1.77 million, 3.3 million, and 100,000 rural Indians, respectively.<sup>11</sup>

And yet, even this integration framework has at most an "inclusive" character. This is reflected in findings like "official neglect" of traditional orthopaedic practitioners who have no registration, uniformity in inter-state regulation, or institutionalized medical training.<sup>12</sup> AYUSH doctors contracted to Medical Officer posts in Primary Health Centres (PHCs) in the southern Indian state of Andhra Pradesh report numerous lacunae in the implementation of the mainstreaming initiatives in the National Rural Health Mission (NRHM):<sup>13</sup> job prerequisites are not indicated, no benefits or allowances provided for health, housing or education, and compensation packages are much lower than those of allopathic doctors. Support for AYUSH practice is also inadequate (lack of infrastructure, trained assistants, and drug supply) and unethical practices have also been reported (documenting attendance of absentees, and non-cooperation from non-AYUSH personnel). Evidence from NRHM suggests that reshuffled AYUSH providers practice forms of medicine beyond the scope of their training.<sup>14</sup> Paradoxically, moreover, some Indian states prohibit cross-system prescription, adding ethical dilemmas for TCA practitioners who serve as the only medical practitioner in resource-poor areas.<sup>14</sup>

At a larger scale, current practices of integration (as in NRHM) have been described as substitution and replacement; which tend to ignore the merits of TCAM and present more barriers than facilitators of integration.<sup>7</sup> Particularly given the strong push towards co-location and other strategies of integration as part of India's move towards Universal Health Coverage, the integration of AYUSH practitioners could result in a doubling of the health workforce. And yet, there are strong fears that such an emphasis on quantitative aspects of integration, i.e. having the right number of practitioners placed at facilities is inadequate. There is a need to critically and qualitatively appraise the government infrastructure to support TCA, identify barriers and facilitators to integration that have emerged from this rapid placement of these practitioners, and

Experiences and meanings of integration

how these TCA practitioners, allopathic practitioners, and health system actors are reacting and adapting to each.

## Methods

This analysis draws from a larger mixed methods implementation research study aimed at understanding operational and ethical challenges in integration of TCA providers for delivery of essential health services in three Indian states. The study looked at the contents and implementation of TCA provider integration policies in 3 states and at national level examining the understanding and interpretations of integration from the perspectives of different health systems actors. These coupled with their experiences in the actual processes of integration of TCA providers were studied using qualitative interview methods to help identify systemic and ethical challenges. Based on this, the study sought to derive strategies to augment the integration of TCA providers in the delivery of essential health services.

Our study was based on action-centred frameworks<sup>15</sup> with a focus on policy *actors* and *processes*.<sup>16</sup> We have therefore sought to understand the implementation of integration policies empirically. A team of four field researchers was oriented by the principal investigator and advisor to the post-positivist paradigm of research, using Yanow's model of interpretative policy analysis, where the emphasis is equally on describing the experience of policy processes, and on elaborating the meanings actors attach to those processes.<sup>17</sup> The research protocol was approved by the Institutional Ethics Committee of the Public Health Foundation of India.

Our methods included semi-structured in-depth interviews (see interview guides, Appendix 1) with policymakers (N=12), administrators (N=43), TCAM practitioners (N=59), allopathic practitioners (N=37), traditional healers (N=7), as well as health workers and community representatives (N=38) in three diverse Indian states (see map, Figure 1). We undertook the study in Kerala, where a number of systems have strong historical and systemic roots (N=74),

Experiences and meanings of integration

Meghalaya, where local health traditions hold sway (N=61), and Delhi, where national, state, and municipal jurisdictions interface with multiple systems of medicine (N=61). Participants were selected based upon maximum variation criteria for each category. We sought to represent different schemes, levels of implementation (directorates, zonal officers), systems of medicine, types of establishments (hospital, dispensary), and years of experience.

In each state, one senior researcher, a research associate and a field researcher developed selection matrices to achieve maximum variation across each category of respondents. In each state, districts (two in Kerala, and three in Meghalaya) or municipal zones (three in Delhi) were chosen to represent variation in accessibility and distribution across TCA providers (eg. small or large proportions of local health practitioners, Homoeopaths, Ayurvedic and/or Unani practitioners). Publicly available records from state and municipal authorities were consulted in order to determine location and type of facility (co-located, stand-alone) as well as suggestions and recommendations from Key Informants. We also ensured that facilities closest to and furthest from district headquarters were chosen for interviews, to maximise variability. We would typically contact providers via cell phone, share information about the study verbally or via email, and set up a time to interview them *in-person*. In some cases, we would arrive during out-patient clinic hours to the chosen facility, share our participant information sheet and seek an appointment time with eligible participants. In most cases, we found that participants were keen to participate once they were aware of the nature of the study and, in some cases, the assurance of confidentiality. We had no refusals, although some allopathic practitioners had to be persuaded to participate by emphasizing that this study was not “pro-TCAM integration” per se, but merely seeking to understand state policy implementation. Interviews, ranging from 15 to 90 minutes in length were undertaken, always with prior informed consent, and separate consent to record interviews. Data were transcribed and stored in password-protected folders and each transcript was checked by investigators for accuracy and quality of transcription.

Experiences and meanings of integration

Textual data from transcripts of interviews as well as notes and observations of facilities and service delivery recorded during fieldwork were analysed through a combination of deductive and inductive techniques in the “framework” approach of qualitative analysis for applied policy research<sup>18</sup> using ATLAS.ti7 software. Themes were developed in three iterations: in the first stage, the lead researcher from each state applied *a priori* codes and closely perused transcripts to devise *emergent* codes, with the support of the Research Associate. *A priori* codes were based on our research questions, reflecting experiences, interpretations and meanings of integration.

*Emergent* codes were used to describe the content or categories of these experiences, interpretations and meanings. Researchers coded 20% of each other’s state datasets to ensure that codes were being applied in a similar, uniform manner. In the second stage, agreement and consolidation of emergent codes across three sites took place under the direction of the study lead; these were then applied to data from each state by its respective lead researcher.

Concurrently, lead researchers developed super-codes, or *analytic* codes to group emergent codes. The study lead finalised and then indexed these codes across sites to arrive at results. Emergent and analytic code families were used to develop analyses, involving sharing of data and consultation across sites. In this paper, we focus on emergent codes related to experiences and interpretations of integration.

## Results

We found that facilitators of integration emerged from individual and interpersonal relationships, while barriers were identified at the systems level (see Table 1).

*Facilitators at the individual/ interpersonal level*

### *A) Collegiality between practitioners within facilities*

Interpersonal collegiality was reported between and across some TCA and allopathic practitioners. In Meghalaya, an allopathic medical officer noted that in some places Ayurvedic

Experiences and meanings of integration

and Homoeopathic doctors were collaborating closely with their allopathic colleagues, expressing an interest in learning more about allopathic practices. In the same state, an AYUSH doctor described cordial relations with the administration, such that when medicine stock-outs happened, the allopathic medical officer supplied stop-gap funds to acquire medicines.

#### ***B) Stature of TCA doctors***

Another aspect was the “stature” of individual practitioners. In Kerala, an Ayurvedic practitioner noted that: “Nobody can question <Name of Well Known Ayurvedic Physician from Kerala>. If he says that taking *chavanaprasham* [health paste] will lead to DNA repair, then nobody can question because they are saying with authority. They are beyond questioning. If somebody else is saying [the same thing], they will ask, where is the proof?” This was also the case with a private sector entity that had opened a branch in Delhi. Practitioners in this institution were highly reputed, involved with transnational research collaborations, and reported numerous cross-referrals from allopathic providers across the city.

#### ***C) Personal initiative of TCA doctors***

Across states, we heard of individual TCA practitioners exercising personal initiative to hasten improvements in infrastructure and service delivery. Following is an excerpt of an interview with an Ayurvedic doctor from a Delhi hospital: “There is a lack of storage space so the diagnosis room is being used for some storage. But I have been treating people in the Public Works Department and then it is getting resolved!” Many of the participants we spoke to in many states were familiar with each other – these personal relationships and interactions, in the absence of official or regular platforms, were the basis for interaction, cross-referral, collective planning and advocacy, and in rarer cases, collaborative research.

#### ***D) Personal experience of allopaths***



Experiences and meanings of integration

Personal experience across systems also helped built trust. In Kerala, an allopath indicated that his own mother-in-law was under Ayurvedic treatment for chronic illness and that she and others he knew were “getting good relief.” He noted that Ayurveda was trustworthy based on this experience. As an Ayurvedic practitioner in Delhi put it, “if one takes a personal interest, there can be a little something. But everyone is busy in their own work. If it is done officially – like in a month, every 2nd Saturday... Then it will happen more systematically.”

***E) Political will of senior health system actors***

Systems level integration was facilitated by highly networked individuals and/or individual access to top decision-makers. One of the health system actors we interviewed had participated in high level negotiations with political leaders in the country to get the AYUSH department formed (formerly the Indian Systems of Medicine & Homoeopathy department) in 1995 – which in many ways marks a critical step in the attention given to integration in the health system. Within the state of Delhi, furthermore, it was the demand articulated by city councillors and ward leaders that resulted in the construction of dispensaries and AYUSH wards in hospitals, so much so that this was considered a norm.

*Barriers at the systems level*

***A) Fragmentation of jurisdictions and facilities***

It was clear that systematic integration was not widely perceived in any of the facilities or states studied. For one, all states had not a single unified system, but rather multiple systems with parallel governance apparatuses, each with their own challenges. In fact, in Delhi, integration was constrained in the system by the fragmentation of jurisdictions and facilities, but also with respect to how providers were posted at facilities. In this state, co-location did take place, but involved an individual TCA practitioner co-located at multiple sites, while multiple allopaths



Experiences and meanings of integration

served at a single site (the biomedical norm). Allopaths had more opportunities, in terms of sheer numbers of people, availability of space and time, to communicate with each other.

**B) *Inter-system isolation and lack of communication***

Given the aforementioned lack of people, space and time, allopaths were socially isolated from, and had fewer chances to communicate with TCA providers or TCA providers with each other. In Kerala, the limitations on communication were shaped in particular by the fact that facilities tended to be stand-alone. In Meghalaya, an allopath stated, simply, “I am doing my work, and they [TCA providers] are doing theirs... that is completely asocial type, separated, segregated.” There was almost no communication between local health practitioners and others – whether AYUSH or allopath simply because of a lack of systemic acknowledgement and legitimacy given to this workforce. A TCA provider remarked: “Very few people listen to our problem. Because, we are still, again, you know, under the general allopathic doctor, ... so when we post our problem you know, hardly like, they table that problem...”

**C) *Lack of trust and awareness of TCA systems***

When speaking about providers as a cadre, group or systems in general, we noted that distrust tended to be highlighted. In Meghalaya, an allopath opined “Please, if you want us to work in a normal way, you know, peacefully, just have these people removed.” A similar sentiment was expressed by a senior Unani hospital practitioner in Delhi, “We can interact as a *pathy* but our basic concepts do not match. We can’t help each other in any way. They are independent, we are independent.” There was limited value, in the view of this practitioner, in engaging with other systems of medicine. An allopath in Kerala described at length how allopathic doctors had protested vehemently – and successfully – against a government policy of Ayurveda doctors getting house surgeon postings in the state. More junior practitioners noted that even with respect to TCAM systems: “We three [Ayurveda, Unani, and Homoeopathy] are together here, but cross-reference is very, very less... We don’t know what is the strong point of Ayurveda,

Experiences and meanings of integration

Unani. Allopath will not know the strong point of Homoeopathy, Ayurveda. They just say ‘skin!’ – that’s all they know!”

#### D) *Inadequate infrastructure and resources for TCA service delivery*

Opportunities to interact were further constrained by the system design of service delivery. We observed in many dispensaries and hospitals in Delhi that non-allopathic practitioners were assigned rooms on the top floor of the facility, while allopaths were allocated multiple rooms on the ground floor (Fieldnotes June 11<sup>th</sup>, 20<sup>th</sup>, 21<sup>st</sup>, 22<sup>nd</sup>, and 27<sup>th</sup> 2012). And, most commonly, the kinds of cases that they were handling included orthopaedic ailments, and other conditions (motor, neurological, gastric) that constrained mobility and created a very real barrier of access to care within a health care facility for patients. Practitioners therefore spend much of their time responding to these inadequacies.

There were also shortcomings in the design of diagnostic services, and inadequacy of human resources. Both Homoeopathic and Ayurvedic practitioners in Kerala noted the recourse to outsourcing diagnostic investigations because of the lack of facilities in their institutions. Further, there was reliance upon contractual recruitment of human resources to address shortages, which affected the stability and reliability of service delivery, in their view. When we asked an administrator of one of Delhi’s newest, state-of-the-art Ayurvedic facilities what kind of coordination occurred across departments as part of the hospital’s functioning, he shrugged and replied, “Nothing as such!”

## Discussion

Most striking in our findings is the emergence of individual experiences and interpretations as enablers or facilitators of integration, in the form of collegiality, recognition of stature, exercise of personal initiative among TCA practitioners and of personal experience of TCAM among allopaths. In contrast, barriers to integration seemed to exist at a systems level. They included

Experiences and meanings of integration

fragmentation of jurisdiction and facilities, inter-system isolation, lack of trust in and awareness of TCA systems, and inadequate infrastructure and resources for TCA service delivery. It is a system where “little somethings” of individuals that catalyse integration are met with “nothing as such” at the systems level.

Some of our findings are not new – the experience of lack of interaction has emerged in Hollenberg’s study on an integrated practice, which reported that weekly doctors’ meetings included only biomedical doctors, not CAM.<sup>19</sup> This study also reported the “geographical dominance” of biomedical doctors in terms of location of consulting rooms, as was found in our study. A study by Broom and colleagues found tension and mistrust, as well as inconsistencies in practice and values related to biomedicine and TCAM, among Indian oncologists.<sup>20</sup> Such challenges were also seen in our study.

Our study also revealed some unique findings with respect to the extant literature. Chung et al, attributed low referral from biomedicine to TCAM in Hong Kong to the lack of articulated and enforced procedures of referral in an integrated medical establishment.<sup>21</sup> In the Indian case, it appears that the vagueness of process both allows ad hoc interactions and referrals based on personal rapport and at the same time discourages the kind of predictable, routine interactions that would allow such rapport to be built. Speaking of integration of Sowa-Rigpa in Bhutan since 1967, Wangchuk and colleagues suggest that there are managerial lessons offered by the juxtaposition and collaboration of conceptually distinct systems within a single administrative and policy unit, such as a ministry.<sup>22</sup> In effect, as they point out, services may not be co-located, but their administration necessarily should be. One could argue that India’s case is different – whether in facilities or administratively, it is not just two systems, but more like eight (across AYUSH systems), that are to be integrated, introducing internal hierarchies and complexities that are unique to the country.

## Experiences and meanings of integration

1  
2  
3 In the 1990s and early 2000s, it was argued that integration is about a “battle between two  
4 scientific truths,”<sup>23</sup> or that the CAM field creates two tendencies: “uninformed skeptics who  
5 don’t believe in anything, and uncritical enthusiasts who don’t care about data.”<sup>24</sup> Analysis of  
6 service delivery in India over a decade later suggests that there are multiple battles being fought –  
7 epistemological, logistical, ethical, and operational across systems, with (re)conciliatory  
8 intercession, at times, of individuals.  
9

10  
11  
12 How can such intercessions be encouraged, catalyzed even? We offer a few suggestions for  
13 activities in the Indian case that leverage the individual facilitators of integration to fill systemic  
14 gaps (see Table 2). These strategies are based on the aforementioned findings in particular states;  
15 their ‘translate-ability’ to other states would have to be examined.  
16

17  
18 For one, improved documentation of clinical cases across systems could be undertaken and  
19 shared. We noted that those AYUSH practitioners who were documenting their practices had  
20 greater stature, opportunities and topics for interaction with peers. Drawing upon personal  
21 initiative and creating experiences of interaction, this could help raise the stature of TCA  
22 practice, while also reducing isolation and lack of awareness. State health departments could  
23 create routine opportunities for interaction and collaboration across systems, and within  
24 facilities. In Delhi, polio immunization has served as an integrative platform for many  
25 practitioners to work together and develop trust and ties. Within facilities, joint staff meetings  
26 may serve a similar purpose. Authorities may also consider rewarding individual initiatives for  
27 integration (through challenge grants or institutional recognition) - these could be designed to  
28 address systems-level barriers to integration. Systems-integration could also be rewarded,  
29 through joint or synergistically achieved targets for referrals, or number of patients cared for  
30 using complementary or adjuvant therapies. As of now, those reporting cross-referrals only  
31 know of each other; if targets were set, there would be greater incentives for and attention to  
32 conditions and protocols for cross-referral. Many practitioners we spoke to suggested that  
33  
34  
35  
36  
37  
38  
39  
40  
41  
42  
43  
44  
45  
46  
47  
48  
49  
50  
51  
52  
53  
54  
55  
56  
57  
58  
59  
60

Experiences and meanings of integration

guidelines for collaboration (including cross-referral) be created. We feel this itself could be a starting point of collaboration amongst TCA providers and with allopathic providers. In each state, the feasibility of each of these strategies would have to be determined, and given due attention through the exertions of powerful stakeholders with political will, who at various points, may find themselves battling each other over policies or power.

## Conclusion

Battles occur between armies, while acts of diplomacy involve intricate latticework relationships among individuals with overlapping needs and interests. Our research across three very different Indian states – Kerala, Meghalaya and Delhi – suggests that strategies that attempt to make the health systems receptive to individual integrative efforts may facilitate integration across systems, creating opportunities for greater collaboration, and trust. We have proposed strategies to this end, which must in turn be additionally tailored to each state context, so that the health system exists in a vibrant but also coherent plurality of human agency.

Experiences and meanings of integration

## Tables

Table 1. Summary of Findings

|                     | Factors at Individual/Interpersonal Level                                                                                                                                                                                                                   |                 | Factors at Group/System Level                                                                                                                                                                                                                              |
|---------------------|-------------------------------------------------------------------------------------------------------------------------------------------------------------------------------------------------------------------------------------------------------------|-----------------|------------------------------------------------------------------------------------------------------------------------------------------------------------------------------------------------------------------------------------------------------------|
| <b>FACILITATORS</b> | A) <b>Collegiality</b> between practitioners within facilities<br>B) <b>Stature</b> of TCA doctors<br>C) <b>Personal initiative</b> of TCA doctors<br>D) <b>Personal experience</b> of allopaths<br>E) <b>Political will</b> of senior health system actors | <b>BARRIERS</b> | A) <b>Fragmentation</b> of jurisdiction and facilities<br>B) Inter-system <b>isolation</b> and lack of communication<br>C) Lack of <b>trust and awareness</b> of TCA systems<br>D) <b>Inadequate infrastructure and resources</b> for TCA service delivery |

Experiences and meanings of integration

**Table 2. Strategies to increase facilitators and decrease barriers to Integration, corresponding with study findings**

| Strategies that may enhance TCA integration for essential health services delivery, based on our findings                                                                                              | Strategies that promote FACILITATORS |         |                     |                     | Strategies that remove BARRIERS |           |                          |                                      |
|--------------------------------------------------------------------------------------------------------------------------------------------------------------------------------------------------------|--------------------------------------|---------|---------------------|---------------------|---------------------------------|-----------|--------------------------|--------------------------------------|
|                                                                                                                                                                                                        | Collegiality                         | Stature | Personal Initiative | Personal Experience | Fragmentation                   | Isolation | Lack of trust/ awareness | Inadequate infrastructure/ resources |
| <b>High level political will required for all strategies</b>                                                                                                                                           |                                      |         |                     |                     |                                 |           |                          |                                      |
| Case documentation and sharing across systems, and in the academic literature                                                                                                                          |                                      | ✓       | ✓                   | ✓                   |                                 | ✓         | ✓                        |                                      |
| Routine opportunities for interaction and collaboration across systems (eg. health camps, health promotion drives)                                                                                     | ✓                                    |         |                     | ✓                   | ✓                               | ✓         | ✓                        | ✓                                    |
| Routine opportunities for interaction within co-located facilities (eg. staff meetings)                                                                                                                | ✓                                    |         |                     | ✓                   | ✓                               | ✓         | ✓                        | ✓                                    |
| Rewards for integrative initiative of individuals (eg. challenge grants or institutional recognition)                                                                                                  | ✓                                    | ✓       | ✓                   | ✓                   |                                 |           |                          |                                      |
| Rewards for integrative initiative at systems or facility level (eg. joint targets like no. of monthly referrals, no. of cases jointly resolved)                                                       |                                      | ✓       |                     | ✓                   | ✓                               | ✓         | ✓                        | ✓                                    |
| Guidelines for collaboration (criteria and conditions for cross-referral, jointly developed by practitioners, non-clinical aspects of work together, including health promotion and managerial duties) |                                      |         |                     | ✓                   | ✓                               | ✓         | ✓                        | ✓                                    |

Experiences and meanings of integration

## Acknowledgements

This research was supported by a Wellcome Trust Capacity Strengthening Strategic Award to the Public Health Foundation of India and a consortium of UK universities. We are grateful for the field support of Kaveri Mayra, Candida Thangkhiew, Bobbylin Nadon, Darisuk Kharlyngdoh, Ivanhoe Marak, as well as Sabitha Chandran, and the guidance of Dr. Sandra Albert.

## Contributorship statement

Kabir Sheikh and John DH Porter made substantial contributions to the conception or design of the work; while Devaki Nambiar, Venkatesh Narayan, JK Lakshmi, and TN Sathyanarayana made substantial contributions to the acquisition of data. All authors substantially contributed to the analysis, and interpretation of data for the work. With Devaki Nambiar playing a lead, coordinating role in drafting the work, all authors revised it critically for important intellectual content, giving final approval of the version to be published. Further, all authors agree to be accountable for all aspects of the work in ensuring that questions related to the accuracy or integrity of any part of the work are appropriately investigated and resolved.

## Competing Interests

None declared.



Experiences and meanings of integration

**Funding**

This research was supported by a Wellcome Trust Capacity Strengthening Strategic Award to the Public Health Foundation of India and a consortium of UK universities.

**Data sharing**

No additional data available.

For peer review only

1  
2  
3  
4  
5  
6  
7  
8  
9  
10  
11  
12  
13  
14  
15  
16  
17  
18  
19  
20  
21  
22  
23  
24  
25  
26  
27  
28  
29  
30  
31  
32  
33  
34  
35  
36  
37  
38  
39  
40  
41  
42  
43  
44  
45  
46  
47  
48  
49  
50  
51  
52  
53  
54  
55  
56  
57  
58  
59  
60

Experiences and meanings of integration

## References

---

<sup>1</sup> World Health Organization. WHO congress on traditional medicine 2008: Beijing declaration.

WHO,2011.

<sup>2</sup> *Resolution of the 62nd World Health Assembly on Traditional Medicine 2009*. EB124.R9. Geneva:

WHA; 2009.

<sup>3</sup> Bodeker G, Kronenberg F. A public health agenda for traditional, complementary, and alternative medicine. *Am J Public Health* 2002;92:1582–91.

<sup>4</sup> Sheikh K, Nambiar D. Government policies for traditional, complementary and alternative medical services in India: from assimilation to integration? *Natl Med J India* 2011;24:245–6.

<sup>5</sup> McLeod H, Chung VCH. The Integration of Traditional and Complementary Medicine in Health Systems. *Presented at the Joint LACA, LAAHS, and PBSS Colloquium*. Hongkong. 2012.

[http://www.actuaries.org/HongKong2012/Presentations/TBR11\\_McLeod.pdf](http://www.actuaries.org/HongKong2012/Presentations/TBR11_McLeod.pdf) (accessed 9 Sep 2013).

<sup>6</sup> Quaiser N. Essentialising the body. Locating medical domination and resistance. *The Newsletter*.

Autumn 2013. <http://www.ias.nl/the-newsletter/article/essentialising-body-locating-medical-domination-and-resistance> (accessed 21 Jan 2013).

<sup>7</sup> Khan S. Systems of medicine and nationalist discourse in India: Towards “new horizons” in medical anthropology and history. *SocSci Med*. 2006;62: 2786-97.

<sup>8</sup> World Health Organization. WHO Traditional Medicine Strategy 2002 – 2005. WHO,2002.

Experiences and meanings of integration

---

1  
2  
3  
4  
5  
6  
7  
8  
9  
10  
11  
12  
13  
14  
15  
16  
17  
18  
19  
20  
21  
22  
23  
24  
25  
26  
27  
28  
29  
30  
31  
32  
33  
34  
35  
36  
37  
38  
39  
40  
41  
42  
43  
44  
45  
46  
47  
48  
49  
50  
51  
52  
53  
54  
55  
56  
57  
58  
59  
60

<sup>9</sup> Lohokare M, Davar BV. The Community Role of Indigenous Healers. In: Sheikh K, George A (eds.) *Health Providers in India: On the Frontlines of Change*. New Delhi: Routledge; 2011. p161–81.

<sup>10</sup> Department of Health and Family Welfare. *Mainstreaming AYUSH under NRHM*.  
<http://203.193.146.66/hfw/PDF/ayus.pdf> (accessed 31 Mar 2011).

<sup>11</sup> Department of AYUSH. *AYUSH under NRHM*.  
<http://indianmedicine.nic.in/writereaddata/linkimages/4468616884-AYUSH%20under%20NRHM.pdf> (accessed 5 Sep 2013).

<sup>12</sup> Unnikrishnan PM, Kumar LHP, Shankar D. Traditional Orthopaedic Practitioners' Place in Contemporary India: A Case Study from Southern India. In: Sheikh K, George A (eds.) *Health Providers in India: On the Frontlines of Change*. New Delhi: Routledge; 2011. p182–99.

<sup>13</sup> Lakshmi JK. Less equal than others? Experiences of AYUSH medical officers in primary health centres in Andhra Pradesh. *Indian J Med Ethics* 2012;9:18–21.

<sup>14</sup> Priya R, Shweta AS. *Status and Role of AYUSH and Local Health Traditions: Under the National Rural Health Mission, Report of a Study*. National Health Systems Resource Centre. 2010.

<sup>15</sup> Barrett S, Fudge C. *Policy and action: essays on the implementation of public policy*. London: Methuen; 1981.

<sup>16</sup> Walt G, Gilson L. Reforming the health sector in developing countries: the central role of policy analysis. *Health Policy Plan* 1994;9:353–70.

<sup>17</sup> Yanow D. *Conducting Interpretive Policy Analysis*. Newbury Park, CA: Sage; 2000.

<sup>18</sup> Ritchie J, Spencer L. Qualitative Data Analysis for Applied Policy Research. In *Analyzing qualitative data*. London: Routledge; 1994. p173-94.

Experiences and meanings of integration

---

1  
2  
3  
4  
5  
6  
7  
8  
9  
10  
11  
12  
13  
14  
15  
16  
17  
18  
19  
20  
21  
22  
23  
24  
25  
26  
27  
28  
29  
30  
31  
32  
33  
34  
35  
36  
37  
38  
39  
40  
41  
42  
43  
44  
45  
46  
47  
48  
49  
50  
51  
52  
53  
54  
55  
56  
57  
58  
59  
60

<sup>19</sup> Hollenberg D. Uncharted ground: Patterns of professional interaction among complementary/alternative and biomedical practitioners in integrative health care settings. *Soc Sci Med* 2006;62:731-44.

<sup>20</sup> Broom A, Doron A, Tovey P. The inequalities of medical pluralism: Hierarchies of health, the politics of tradition and the economies of care in Indian oncology. *Soc Sci Med* 2009;69:698–706.

<sup>21</sup> Chung VC, Hillier S, Lau CH, et al. Referral to and attitude towards traditional Chinese medicine amongst western medical doctors in postcolonial Hong Kong. *Soc Sci Med* 2011;72:247-55.

<sup>22</sup> Wangchuk P, Wangchuk D, Aagaard-Hansen J. Traditional Bhutanese medicine (gSo-BA Rig-PA): an integrated part of the formal health care services. *Southeast Asian J Trop Med Public Health* 2007;38:161–7.

<sup>23</sup> Bloom H. *The Lucifer Principle. A Scientific Expedition into the Forces of History*. New York: The Atlantic Monthly Press;1995.

<sup>24</sup> Northridge ME, Mack Jr R. Integrating ethnomedicine into public health. *Am J Public Health* 2002;92:1561-61.

1  
2  
3  
4 Experiences and meanings of integration

5  
6 Running Head: Experiences and meanings of integration

7  
8  
9 Title: Experiences and meanings of integration of TCAM (Traditional, Complementary and  
10 Alternative Medical) providers in three Indian states: Results from a cross-sectional, qualitative  
11 implementation research study  
12  
13  
14  
15  
16  
17

18 Authors: D Nambiar,<sup>1</sup> VV Narayan,<sup>2</sup> JK Lakshmi,<sup>3</sup> [JDH](#) Porter,<sup>4</sup> TN Sathyanarayana,<sup>3</sup> K  
19 Sheikh<sup>9</sup>  
20  
21

22 1 Public Health Foundation of India, New Delhi, India

23 2 All India Institute of Medical Sciences, New Delhi, India

24 3 Indian Institute of Public Health, Hyderabad, India

25 4 London School of Hygiene and Tropical Medicine, London, United Kingdom  
26  
27  
28  
29  
30  
31  
32  
33  
34  
35

36 Corresponding Author Information:

37 Devaki Nambiar, PhD

38 Research Scientist

39 Public Health Foundation of India

40 ISID, 4 Institutional Area

41 Vasant Kunj 110067

42  
43  
44  
45  
46  
47  
48  
49  
50  
51 Keywords: Alternative Medicine, Qualitative Evaluation, World Health

52  
53 Word Count: 3,868

54  
55  
56 1 of 21  
57  
58  
59  
60

Experiences and meanings of integration

## Acknowledgements

This research was supported by a Wellcome Trust Capacity Strengthening Strategic Award to the Public Health Foundation of India and a consortium of UK universities. We are grateful for the field support of Kaveri Mayra, Candida Thangkhiew, Bobbylin Nadon, Darisuk Kharlyngdoh, Ivanhoe Marak, as well as Sabitha Chandran, and the guidance of Dr. Sandra Albert.

## Strengths

\* Multi-sited qualitative study drawing on meanings and experiences across patients, providers, and health systems administrators

\* Implementation research using ~~rigorously~~ ~~rigorously~~ applied interpretive policy analysis methods

\* Linked to India's path ~~to~~ Universal Health Coverage

## Limitations

\* Cross-sectional study, so other than self-report of historical changes, we were not able to chart or map changed views or experiences of participants in vivo.

\* Focus on the public service delivery sector, even as a great deal of health-seeking takes place in the private sector, with the assumption that public sector strengthening is highly desirable, and possible only through focused study on it.

## Competing Interests

None declared.

Experiences and meanings of integration

## Contributorship statement

Kabir Sheikh and John DH Porter made substantial contributions to the conception or design of the work; while Devaki Nambiar, Venkatesh Narayan, JK Lakshmi, and TN Sathyanarayana made substantial contributions to the acquisition of data. All authors substantially contributed to the analysis, and interpretation of data for the work. With Devaki Nambiar playing a lead, coordinating role in drafting the work, all authors revised it critically for important intellectual content, giving final approval of the version to be published. Further, all authors agree to be accountable for all aspects of the work in ensuring that questions related to the accuracy or integrity of any part of the work are appropriately investigated and resolved.

## Competing interests

~~None to declare.~~

## Funding

This research was supported by a Wellcome Trust Capacity Strengthening Strategic Award to the Public Health Foundation of India and a consortium of UK universities.

## Data sharing

No additional data available.

3 of 21

Experiences and meanings of integration

## Introduction

The 1978 Alma Ata declaration called for traditional medicine; treatments and practices to be “preserved, promoted and communicated widely and appropriately based on the circumstances in each country.” Thirty years later, the 2008 Beijing Declaration on Traditional Medicine called for integration of providers into national health systems, recommending systems of qualification, accreditation, regulation and communication (with allopathic providers).<sup>1</sup> These features of the Beijing Declaration were echoed at the 62<sup>nd</sup> World Health Assembly in 2009, putting out a call to action to United Nations member states to move forward with their plans for integration.<sup>2</sup> The global positioning of Traditional, Complementary, and Alternative Medicine (TCAM) has issued from and tends to imply a central focus on clinical and experimental medicine,<sup>3</sup> yet, recent calls for health systems integration, ~~draw~~drawing attention to features like education, accreditation, regulation, and health services provision, ~~and draw attention to~~ the TCAM health workforce itself.

In earlier work, we have identified three broad trends of integration as it relates to TCA providers: self-regulation with governmental linkage, government regulation and provisioning, and hybrid/parallel models.<sup>4</sup> This links roughly to the WHO nosology, where three models are identified: “tolerant” systems where the national health care system is based entirely on biomedicine but some TCAM practices are legally permissible, “inclusive” systems where TCAM is recognised but not fully integrated into all aspects of healthcare, and “integrative,” where TCAM is officially recognised in national drug policy, providers and products are registered and regulated, therapies are widely available and covered under insurance schemes, research and education are widely accessible.<sup>5</sup>

The situation on the ground in India, hybrid in our view, seems in parts to reflect tendencies across WHO categories. The dominance of biomedicine appears to be a critical feature of India’s

4 of 21



1  
2  
3  
4 Experiences and meanings of integration

5  
6 postcolonial health system, even as pre-independence, the TCAM practitioner community had  
7  
8 played a major role in resisting colonial domination in the practice of (bio)medicine.<sup>6</sup> In part as a  
9  
10 response to the reliance on allopathy throughout modern Indian history, there have been strong  
11  
12 arguments in favour of the critical role that non-mainstream practitioners play in offering  
13  
14 accessible, affordable, and socially acceptable health services to populations.**Error! Bookmark**  
15  
16 **not defined.**<sup>7,8</sup> A study in Maharashtra reported that the situation of traditional healing as a  
17  
18 community function through shared explanatory frameworks across provider and patient are  
19  
20 explicitly unlike typical doctor-patient relationships.<sup>9</sup>

21  
22 In India, one can also find a larger integrative framework, one that mandates “mainstreaming” of  
23  
24 codified TCAM in India, collectively referred to as AYUSH, an acronym for Ayurveda, Yoga &  
25  
26 Naturopathy, Unani, Siddha, Sowa-Rigpa, and Homoeopathy. The National Rural Health  
27  
28 Mission (NRHM), launched in 2005 to fortify public health in rural India, took a particular  
29  
30 interest in integrating AYUSH practitioners through facilitation of specialised AYUSH practice,  
31  
32 integration of AYUSH practitioners in national health programmes, incorporation of AYUSH  
33  
34 modalities in primary health care, strengthening the governance of AYUSH practice, support for  
35  
36 AYUSH education, establishment of laboratories and research facilities for AYUSH, and  
37  
38 providing infrastructural support.<sup>10</sup> Human resource-focused strategies included contractual  
39  
40 appointment of AYUSH doctors in Community and Primary Health Centres, appointment of  
41  
42 paramedics, compounders, data assistants, and managers to support AYUSH practice,  
43  
44 establishment of specialised therapy centres for AYUSH providers, inclusion of AYUSH doctors  
45  
46 in national disease control programmes; and incorporation of AYUSH drugs into community  
47  
48 health workers’ primary health care kits. A recent report from the AYUSH department reports  
49  
50 that NRHM has established AYUSH facilities in co-location with health facilities in many Indian  
51  
52 states (notably, not in Kerala, where the stand-alone AYUSH facility is the chosen norm).<sup>11</sup> As  
53  
54 of 2012, more than three quarters of India’s district hospitals, over half of its Community Health

55  
56 5 of 21  
57  
58  
59  
60

1  
2  
3  
4 Experiences and meanings of integration  
5

6 Centres and over a third of India's Primary Health Centres have AYUSH co-location, serving  
7  
8 about 1.77 million, 3.3 million, and 100,000 rural Indians, respectively.<sup>11</sup>  
9

10  
11 And yet, even this integration framework has at most an "inclusive" character. This is reflected  
12  
13 in findings like "official neglect" of traditional orthopaedic practitioners who have no  
14  
15 registration, uniformity in inter-state regulation, or institutionalized medical training.<sup>12</sup> AYUSH  
16  
17 doctors contracted to Medical Officer posts in Primary Health Centres (PHCs) in the southern  
18  
19 Indian state of Andhra Pradesh report numerous lacunae in the implementation of the  
20  
21 mainstreaming initiatives in the National Rural Health Mission (NRHM):<sup>13</sup> job perquisites are not  
22  
23 indicated, no benefits or allowances provided for health, housing or education, and  
24  
25 compensation packages are much lower than those of allopathic doctors. Support for AYUSH  
26  
27 practice is also inadequate (lack of infrastructure, trained assistants, and drug supply) and  
28  
29 unethical practices have also been reported (documenting attendance of absentees, and non-  
30  
31 cooperation from non-AYUSH personnel). Evidence from NRHM suggests that reshuffled  
32  
33 AYUSH providers practice forms of medicine beyond the scope of their training.<sup>14</sup> Paradoxically,  
34  
35 moreover, some Indian states prohibit cross-system prescription, adding ethical dilemmas for  
36  
37 TCA practitioners who serve as the only medical practitioner in resource-poor areas.<sup>14</sup>

38  
39 At a larger scale, current practices of integration (as in NRHM) have been described as  
40  
41 substitution and replacement; which tend to ignore the merits of TCAM and present more  
42  
43 barriers than facilitators of integration.<sup>7</sup> Particularly given the strong push towards co-location  
44  
45 and other strategies of integration as part of India's move towards Universal Health Coverage,  
46  
47 the integration of AYUSH practitioners could result in a doubling of the health workforce. And  
48  
49 yet, there are strong fears that such an emphasis on quantitative aspects of integration, i.e. having  
50  
51 the right number of practitioners placed at facilities is inadequate. There is a need to critically and  
52  
53 qualitatively appraise the government infrastructure to support TCA, identify barriers and  
54  
55 facilitators to integration that have emerged from this rapid placement of these practitioners, and

56 6 of 21  
57  
58  
59  
60

Experiences and meanings of integration

how these TCA practitioners, allopathic practitioners, and health system actors are reacting and adapting to each.

## Methods

This analysis draws from a larger mixed methods implementation research study aimed at understanding operational and ethical challenges in integration of TCA providers for delivery of essential health services in three Indian states. The study looked at the contents and implementation of TCA provider integration policies in 3 states and at national level examining the understanding and interpretations of integration from the perspectives of different health systems actors. These coupled with their experiences in the actual processes of integration of TCA providers were studied using qualitative interview methods to help identify systemic and ethical challenges. Based on this, the study sought to derive strategies to augment the integration of TCA providers in the delivery of essential health services.

Our study was based on action-centred frameworks<sup>15</sup> with a focus on policy *actors* and *processes*.<sup>16</sup>

We have therefore sought to understand the implementation of integration policies empirically.

A team of four field researchers was oriented by the principal investigator and advisor to the post-positivist paradigm of research, using Yanow's model of interpretative policy analysis, where the emphasis is equally on describing the experience of policy processes, and on

elaborating the meanings actors attach to those processes.<sup>17</sup> The research protocol was approved by the Institutional Ethics Committee of the Public Health Foundation of India.

Our methods included semi-structured in-depth interviews (see interview guides, Appendix 1)

with policymakers (N=12), administrators (N=43), TCAM practitioners (N=59), allopathic practitioners (N=37), traditional healers (N=7), as well as health workers and community representatives (N=38) in three diverse Indian states (see map, Figure 1). We undertook the study in Kerala, where a number of systems have strong historical and systemic roots (N=74),

7 of 21

1  
2  
3  
4 Experiences and meanings of integration  
5

6 Meghalaya, where local health traditions hold sway (N=61), and Delhi, where national, state, and  
7  
8 municipal jurisdictions interface with multiple systems of medicine (N=61).- Participants were  
9  
10 selected based upon maximum variation criteria for each category. We sought to represent  
11  
12 different schemes, levels of implementation (directorates, zonal officers), systems of medicine,  
13  
14 types of establishments (hospital, dispensary), and years of experience.  
15

16  
17 In each state, one senior researcher, a research associate and a field researcher developed  
18  
19 selection matrices to achieve maximum variation across each category of respondents. In each  
20  
21 state, ~~two~~ districts ~~(two were chosen (in Kerala, and the case of Delhi, three in Meghalaya) or~~  
22  
23 municipal zones ~~(three in Delhi) were chosen to represent) that represented~~ variation in  
24  
25 accessibility and distribution across TCA providers (eg. small or large proportions of local health  
26  
27 practitioners, Homoeopaths, Ayurvedic and/or Unani practitioners). Publicly available records  
28  
29 from state and municipal authorities were consulted in order to determine location and type of  
30  
31 facility (co-located, stand-alone) as well as suggestions and recommendations from Key  
32  
33 Informants. We also ensured that facilities closest to and furthest from district headquarters were  
34  
35 chosen for interviews, to maximise variability. We would typically contact providers via cell  
36  
37 phone, share information about the study verbally or via email, and set up a time to interview  
38  
39 them in-person. In some cases, we would arrive during out-patient clinic hours to the chosen  
40  
41 facility, share our participant information sheet and seek an appointment time with eligible  
42  
43 participants. In most cases, we found that participants were keen to participate once they were  
44  
45 aware of the nature of the study and, in some cases, the assurance of confidentiality. We had no  
46  
47 refusals, although some allopathic practitioners had to be persuaded to participate by  
48  
49 emphasizing that this study was not “pro-TCAM integration” per se, but merely seeking to  
50  
51 understand state policy implementation. Interviews, ranging from 15 to 90 minutes in length  
52  
53 were undertaken, always with prior informed consent, and separate consent to record interviews.  
54  
55

56 8 of 21  
57  
58  
59  
60

1  
2  
3  
4 Experiences and meanings of integration

5  
6 Data were transcribed and stored in password-protected folders and each transcript was checked  
7  
8 by investigators for accuracy and quality of transcription.  
9

10  
11 Textual data from transcripts of interviews as well as notes and observations of facilities and  
12  
13 service delivery recorded during fieldwork were analysed through a combination of deductive  
14  
15 and inductive techniques in the “framework” approach of qualitative analysis for applied policy  
16  
17 research<sup>18</sup> using ATLAS.ti7 software. Themes were developed in three iterations: in the first  
18  
19 stage, the lead researcher from each state applied *a priori* codes and closely perused transcripts to  
20  
21 devise *emergent* codes, with the support of the Research Associate. *A priori* codes were based on  
22  
23 our research questions, reflecting experiences, interpretations and meanings of integration. (eg:  
24  
25 ~~Te\_Ap\_El\_Adm refers to a TCAM providers’ explanation of experience of interactions with~~  
26  
27 ~~administration in the facility or the health care system).~~ *Emergent* codes were used to describe the  
28  
29 content or categories of these experiences, interpretations and meanings. (eg: ~~Em\_El\_IndInit~~  
30  
31 ~~refers to personal initiative as a determinant of integration).~~ Researchers coded 20% of each  
32  
33 other’s state datasets to ensure that codes were being applied in a similar, uniform manner. In the  
34  
35 second stage, agreement and consolidation of emergent codes across three sites took place under  
36  
37 the direction of the study lead; these were then applied to data from each state by its respective  
38  
39 lead researcher. Concurrently, lead researchers developed super-codes, or *analytic* codes to group  
40  
41 emergent codes. (eg: ~~An\_Ope\_Adhoc refers to adhocism in policies and practices related to~~  
42  
43 ~~integration).~~ The study lead finalised and then indexed these codes across sites to arrive at  
44  
45 results. Emergent and analytic code families were used to develop analyses, involving sharing of  
46  
47 data and consultation across sites. In this paper, we focus on emergent codes related to  
48  
49 experiences and interpretations of integration.  
50  
51  
52  
53  
54  
55

56 9 of 21  
57  
58  
59  
60

Experiences and meanings of integration

## Results

We found that facilitators of integration emerged from individual and interpersonal relationships, while barriers were identified at the systems level (see Table 1).

### *Facilitators at the individual/interpersonal level*

#### **A) Collegiality between practitioners within facilities**

-Interpersonal collegiality was reported between and across some TCA and allopathic practitioners. In Meghalaya, an allopathic medical officer noted that in some places Ayurvedic and Homoeopathic doctors were collaborating closely with their allopathic colleagues, expressing an interest in learning more about allopathic practices. In the same state, an AYUSH doctor described cordial relations with the administration, such that when medicine stock-outs happened, the allopathic medical officer supplied stop-gap funds to acquire medicines.

#### **B) Stature of TCA doctors**

Another aspect was the “stature” of individual practitioners. In Kerala, an Ayurvedic practitioner noted that: “Nobody can question <Name of Well Known Ayurvedic Physician from Kerala>. If he says that taking *chavanaprasham* [health paste] will lead to DNA repair, then nobody can question because they are saying with authority. They are beyond questioning. If somebody else is saying [the same thing], they will ask, where is the proof?” This was also the case with a private sector entity that had opened a branch in Delhi. Practitioners in this institution were highly reputed, involved with transnational research collaborations, and reported numerous cross-referrals from allopathic providers across the city.

#### **C) Personal initiative of TCA doctors**

Across states, we heard of individual TCA practitioners exercising personal initiative to hasten improvements in infrastructure and service delivery. Following is an excerpt of an interview with

10 of 21

Experiences and meanings of integration

an Ayurvedic doctor from a Delhi hospital: “There is a lack of storage space so the diagnosis room is being used for some storage. But I have been treating people in the Public Works Department and then it is getting resolved!” Many of the participants we spoke to in many states were familiar with each other – these personal relationships and interactions, in the absence of official or regular platforms, were the basis for interaction, cross-referral, collective planning and advocacy, and in rarer cases, collaborative research.

**D) *Personal experience of allopaths***

Personal experience across systems also helped build trust. In Kerala, an allopath indicated that his own mother-in-law was under Ayurvedic treatment for chronic illness and that she and others he knew were “getting good relief.” He noted that Ayurveda was trustworthy based on this experience. As an Ayurvedic practitioner in Delhi put it, “if one takes a personal interest, there can be a little something. But everyone is busy in their own work. If it is done officially – like in a month, every 2nd Saturday... Then it will happen more systematically.”

**E) *Political will of senior health system actors***

Systems level integration was facilitated by highly networked individuals and/or individual access to top decision-makers. One of the health system actors we interviewed had participated in high level negotiations with political leaders in the country to get the AYUSH department formed (formerly the Indian Systems of Medicine & Homoeopathy department) in 1995 – which in many ways marks a critical step in the attention given to integration in the health system. Within the state of Delhi, furthermore, it was the demand articulated by city councillors and ward leaders that resulted in the construction of dispensaries and AYUSH wards in hospitals, so much so that this was considered a norm.

Barriers at the ~~systems~~ ~~system~~ level

**A) *Fragmentation of jurisdictions and facilities***

11 of 21

1  
2  
3  
4 Experiences and meanings of integration  
5  
6

7 It was clear that systematic integration was not widely perceived in any of the facilities or states  
8 studied. For one, all states had not a single unified system, but rather multiple systems with  
9 parallel governance apparatuses, each with their own challenges. In fact, in Delhi, integration was  
10 constrained in the system by the fragmentation of jurisdictions and facilities, but also with  
11 respect to how providers were posted at facilities. In this state, co-location did take place, but  
12 involved an individual TCA practitioner co-located at multiple sites, while multiple allopaths  
13 served at a single site (the biomedical norm). Allopaths had more opportunities, in terms of sheer  
14 numbers of people, availability of space and time, to communicate with each other.  
15  
16  
17  
18  
19  
20

21  
22 **B) *Inter-system isolation and lack of communication***  
23

24 Given the aforementioned lack of people, space and time, allopaths were socially isolated from,  
25 and had fewer chances to communicate with TCA providers or TCA providers with each other.  
26  
27

28 In Kerala, the limitations on communication were shaped in particular by the fact that facilities  
29 tended to be stand-alone. In Meghalaya, an ~~allopath-Ayurveda doctor~~ stated, simply, “I am doing  
30 my work, ~~and they [TCA providers] are doing theirs...~~ that is completely asocial type, separated,  
31 segregated.” There was almost no communication between local health practitioners and others  
32 – whether AYUSH or allopath simply because of a lack of systemic acknowledgement and  
33 legitimacy given to this workforce. ~~A TCA provider remarked: “Very. This doctor went on: “very~~  
34 few people listen to our problem. Because, we are still, again, you know, under the general  
35 allopathic doctor, ...so when we post our problem you know, hardly like, they table that  
36 problem...”  
37  
38  
39  
40  
41  
42  
43  
44

45  
46 **C) *Lack of trust and awareness of TCA systems***  
47

48 When speaking about providers as a cadre, group or systems in general, we noted that distrust  
49 tended to be highlighted. In Meghalaya, an allopath opined “Please, if you want us to work in a  
50 normal way, you know, peacefully, just have these people removed.” A similar sentiment was  
51 expressed by a senior Unani hospital practitioner in Delhi, “We can interact as a *pathy* but our  
52  
53  
54  
55

56 12 of 21  
57  
58  
59  
60



1  
2  
3  
4 Experiences and meanings of integration  
5

6 basic concepts do not match. We can't help each other in any way. They are independent, we are  
7 independent." There was limited value, in the view of this practitioner, in engaging with other  
8 systems of medicine. An allopath in Kerala described at length how allopathic doctors had  
9 protested vehemently – and successfully – against a government policy of Ayurveda doctors  
10 getting house surgeon postings in the state. More junior practitioners noted that even with  
11 respect to TCAM systems: "We three [Ayurveda, Unani, and Homoeopathy] are together here,  
12 but cross-reference is very, very less... We don't know what is the strong point of Ayurveda,  
13 Unani. Allopath will not know the strong point of Homoeopathy, Ayurveda. They just say 'skin!'  
14 – that's all they know!"  
15  
16  
17  
18  
19  
20  
21  
22  
23

24 *D) Inadequate infrastructure and resources for TCA service delivery*  
25

26 Opportunities to interact were further constrained by the system design of service delivery. We  
27 observed in many dispensaries and hospitals in Delhi that non-allopathic practitioners were  
28 assigned rooms on the top floor of the facility, while allopaths were allocated multiple rooms on  
29 the ground floor (Fieldnotes June 11<sup>th</sup>, 20<sup>th</sup>, 21<sup>st</sup>, 22<sup>nd</sup>, and 27<sup>th</sup> 2012). And, most commonly, the  
30 kinds of cases that they were handling included orthopaedic ailments, and other conditions  
31 (motor, neurological, gastric) that constrained mobility and created a very real barrier of access to  
32 care within a health care facility for patients. Practitioners therefore spend much of their time  
33 responding to these inadequacies.  
34  
35  
36  
37  
38  
39  
40  
41

42 There were also shortcomings in the design of diagnostic services, and inadequacy of human  
43 resources. Both Homoeopathic and Ayurvedic practitioners in Kerala noted the recourse to  
44 outsourcing diagnostic investigations because of the lack of facilities in their institutions. Further,  
45 there was reliance upon contractual recruitment of human resources to address shortages, which  
46 affected the stability and reliability of service delivery, in their view. When we asked an  
47 administrator of one of Delhi's newest, state-of-the-art Ayurvedic facilities what kind of  
48  
49  
50  
51  
52  
53  
54

55  
56 13 of 21  
57  
58  
59  
60

1  
2  
3  
4 Experiences and meanings of integration  
5  
6

7 coordination occurred across departments as part of the hospital's functioning, he shrugged and  
8 replied, "Nothing as such!"  
9

## 10 11 12 Discussion

13  
14 Most striking in our findings is the emergence of individual experiences and interpretations as  
15 enablers or facilitators of integration, in the form of collegiality, recognition of stature, exercise  
16 of personal initiative among TCA practitioners and of personal experience of TCAM among  
17 allopaths. In contrast, barriers to integration seemed to exist at a systems level. They included  
18 fragmentation of jurisdiction and facilities, inter-system isolation, lack of trust in and awareness  
19 of TCA systems, and inadequate infrastructure and resources for TCA service delivery. It is a  
20 system where "little somethings" of individuals that catalyse integration are met with "nothing as  
21 such" at the systems level.  
22  
23  
24  
25  
26  
27  
28  
29

30 Some of our findings are not new – the experience of lack of interaction has emerged in  
31 Hollenberg's study on an integrated practice, which reported that weekly doctors' meetings  
32 included only biomedical doctors, not CAM.<sup>19</sup> This study also reported the "geographical  
33 dominance" of biomedical doctors in terms of location of consulting rooms, as was found in our  
34 study. A study by Broom and colleagues found tension and mistrust, as well as inconsistencies in  
35 practice and values related to biomedicine and TCAM, among Indian oncologists.<sup>20</sup> Such  
36 challenges were also seen in our study.  
37  
38  
39  
40  
41  
42  
43

44 Our study also revealed some unique findings with respect to the extant literature. Chung et al,  
45 attributed low referral from biomedicine to TCAM in Hong Kong to the lack of articulated and  
46 enforced procedures of referral in an integrated medical establishment.<sup>21</sup> In the Indian case, it  
47 appears that the vagueness of process both allows ad hoc interactions and referrals based on  
48 personal rapport and at the same time discourages the kind of predictable, routine interactions  
49 that would allow such rapport to be built. Speaking of integration of Sowa-Rigpa in Bhutan since  
50  
51  
52  
53  
54

55  
56 14 of 21  
57  
58  
59  
60

1  
2  
3  
4 Experiences and meanings of integration  
5

6  
7 1967, Wangchuk and colleagues suggest that there are managerial lessons offered by the  
8  
9 juxtaposition and collaboration of conceptually distinct systems within a single administrative  
10  
11 and policy unit, such as a ministry.<sup>22</sup> In effect, as they point out, services may not be co-located,  
12  
13 but their administration necessarily should be. One could argue that India's case is different –  
14  
15 whether in facilities or administratively, it is not just two systems, but more like eight (across  
16  
17 AYUSH systems), that are to be integrated, introducing internal hierarchies and complexities that  
18  
19 are unique to the country.

20  
21 In the 1990s and early 2000s, it was argued that integration is about a “battle between two  
22  
23 scientific truths,”<sup>23</sup> or that the CAM field creates two tendencies: “uninformed skeptics who  
24  
25 don't believe in anything, and uncritical enthusiasts who don't care about data.”<sup>24</sup> Analysis of  
26  
27 service delivery in India over a decade later suggests that there are multiple battles being fought –  
28  
29 epistemological, logistical, ethical, and operational across systems, with (re)conciliatory  
30  
31 intercession, at times, of individuals.

32  
33 How can such intercessions be encouraged, catalyzed even? We offer a few suggestions for  
34  
35 activities in the Indian case that leverage the individual facilitators of integration to fill systemic  
36  
37 gaps (see Table 2). These strategies are based on the aforementioned findings in particular states;  
38  
39 their ‘translate-ability’ to other states would have to be examined.

40  
41 For one, improved documentation of clinical cases across systems could be undertaken and  
42  
43 shared. We noted that those AYUSH practitioners who were documenting their practices had  
44  
45 greater stature, opportunities and topics for interaction with peers. Drawing upon personal  
46  
47 initiative and creating experiences of interaction, this could help raise the stature of TCA  
48  
49 practice, while also reducing isolation and lack of awareness. State health departments could  
50  
51 create routine opportunities for interaction and collaboration across systems, and within  
52  
53 facilities. In Delhi, polio immunization has served as an integrative platform for many  
54  
55 practitioners to work together and develop trust and ties. Within facilities, joint staff meetings

56  
57 15 of 21  
58  
59  
60

Experiences and meanings of integration

may serve a similar purpose. Authorities may also consider rewarding individual initiatives for integration (through challenge grants or institutional recognition) - these could be designed to address ~~systems~~system-level barriers to integration. Systems-integration could also be rewarded, through joint or synergistically achieved targets for referrals, or number of patients cared for using complementary or adjuvant therapies. As of now, those reporting cross-referrals only know of each other; if targets were set, there would be greater incentives for and attention to conditions and protocols for cross-referral. Many practitioners we spoke to suggested that guidelines for collaboration (including cross-referral) be created. We feel this itself could be a starting point of collaboration amongst TCA providers and with allopathic providers. In each state, the feasibility of each of these strategies would have to be determined, and given due attention through the exertions of powerful stakeholders with political will, who at various points, may find themselves battling each other over policies or power.

## Conclusion

Battles occur between armies, while acts of diplomacy involve intricate latticework relationships ~~among~~ individuals with overlapping needs and interests. Our research across three very different Indian states – Kerala, Meghalaya and Delhi – suggests that strategies that attempt to make the health systems receptive to individual integrative efforts may facilitate integration across systems, creating opportunities for greater collaboration, and trust. We have proposed strategies to this end, which must in turn be additionally tailored to each state context, so that the health system exists in a vibrant but also coherent plurality of ~~h~~human agency.

Experiences and meanings of integration

Tables

Table 1. Summary of Findings

|                     | Factors at Individual/Interpersonal Level                                                                                                                                                                                                                   |                 | Factors at Group/System Level                                                                                                                                                                                                                              |
|---------------------|-------------------------------------------------------------------------------------------------------------------------------------------------------------------------------------------------------------------------------------------------------------|-----------------|------------------------------------------------------------------------------------------------------------------------------------------------------------------------------------------------------------------------------------------------------------|
| <b>FACILITATORS</b> | A) <b>Collegiality</b> between practitioners within facilities<br>B) <b>Stature</b> of TCA doctors<br>C) <b>Personal initiative</b> of TCA doctors<br>D) <b>Personal experience</b> of allopaths<br>E) <b>Political will</b> of senior health system actors | <b>BARRIERS</b> | A) <b>Fragmentation</b> of jurisdiction and facilities<br>B) Inter-system <b>isolation</b> and lack of communication<br>C) Lack of <b>trust and awareness</b> of TCA systems<br>D) <b>Inadequate infrastructure and resources</b> for TCA service delivery |

Experiences and meanings of integration

**Table 2. Strategies Recommendations to increase facilitators and decrease barriers to promote/address Integration, corresponding with study findings**

| <u>Strategies that may enhance TCA integration for essential health services delivery, based on our findings</u>                                                                                       | <u>Strategies that promote FACILITATORS</u> |         |                     |                     | <u>Strategies that remove BARRIERS</u> |           |                         |                                     | Merged Cells                                                                |
|--------------------------------------------------------------------------------------------------------------------------------------------------------------------------------------------------------|---------------------------------------------|---------|---------------------|---------------------|----------------------------------------|-----------|-------------------------|-------------------------------------|-----------------------------------------------------------------------------|
| <u>Strategies to promote TCA integration for essential health services delivery, based on our findings</u>                                                                                             | Collegiality                                | Stature | Personal Initiative | Personal Experience | Fragmentation                          | Isolation | Lack of trust/awareness | Inadequate infrastructure/resources | Formatted: Font: Font color: Dark Red                                       |
| <b>High level political will required for all strategies</b>                                                                                                                                           |                                             |         |                     |                     |                                        |           |                         |                                     |                                                                             |
| Case documentation and sharing across systems, and in the academic literature                                                                                                                          | ▲                                           | ✓+      | ✓+                  | ✓+                  |                                        | ✓+        | ✓+                      | ✓                                   | Formatted: Font: Font color: Dark Red                                       |
| Routine opportunities for interaction and collaboration across systems (eg. health camps, health promotion drives)                                                                                     | ✓+                                          |         |                     | ✓+                  | ✓+                                     | ✓+        | ✓+                      | ✓+                                  | Formatted: Font: Font color: Dark Red                                       |
| Routine opportunities for interaction within co-located facilities (eg. staff meetings)                                                                                                                | ✓+                                          |         |                     | ✓+                  | ✓+                                     | ✓+        | ✓+                      | ✓+                                  | Formatted: Font: Font color: Dark Red                                       |
| Rewards for integrative initiative of individuals (eg. challenge grants or institutional recognition)                                                                                                  | ✓+                                          | ✓+      | ✓+                  | ✓+                  |                                        |           |                         | ✓                                   | Formatted: Font: Italic, Font color: Dark Red                               |
| Rewards for integrative initiative at systems or facility level (eg. joint targets like no. of monthly referrals, no. of cases jointly resolved)                                                       | ▲                                           | ✓+      |                     | ✓+                  | ✓+                                     | ✓+        | ✓+                      | ✓+                                  | Formatted: Indent: Left: 0", Add space between paragraphs of the same style |
| Guidelines for collaboration (criteria and conditions for cross-referral, jointly developed by practitioners, non-clinical aspects of work together, including health promotion and managerial duties) | ▲                                           |         |                     | ✓+                  | ✓+                                     | ✓+        | ✓+                      | ✓                                   | Formatted: Indent: Left: 0", Add space between paragraphs of the same style |

1  
2  
3  
4 Experiences and meanings of integration  
5  
6

7  
8 **References**  
9

---

10  
11  
12 <sup>1</sup> World Health Organization. WHO congress on traditional medicine 2008: Beijing declaration.  
13 WHO,2011.  
14

15  
16  
17 <sup>2</sup> *Resolution of the 62nd World Health Assembly on Traditional Medicine 2009*. EB124.R9. Geneva:  
18 WHA; 2009.  
19

20  
21  
22 <sup>3</sup> Bodeker G, Kronenberg F. A public health agenda for traditional, complementary, and  
23 alternative medicine. *Am J Public Health* 2002;92:1582–91.  
24

25  
26 <sup>4</sup> Sheikh K, Nambiar D. Government policies for traditional, complementary and alternative  
27 medical services in India: from assimilation to integration? *Natl Med J India* 2011;24:245–6.  
28

29  
30 <sup>5</sup> McLeod H, Chung VCH. The Integration of Traditional and Complementary Medicine in  
31 Health Systems. *Presented at the Joint LACA, IAAHS, and PBSS Colloquium*. Hongkong. 2012.  
32 [http://www.actuaries.org/HongKong2012/Presentations/TBR11\\_McLeod.pdf](http://www.actuaries.org/HongKong2012/Presentations/TBR11_McLeod.pdf) (accessed 9 Sep  
33 2013).  
34  
35  
36

37  
38 <sup>6</sup> Quaiser N. Essentialising the body. Locating medical domination and resistance. *The Newsletter*.  
39 Autumn 2013. [http://www.iias.nl/the-newsletter/article/essentialising-body-locating-medical-](http://www.iias.nl/the-newsletter/article/essentialising-body-locating-medical-domination-and-resistance)  
40 [domination-and-resistance](http://www.iias.nl/the-newsletter/article/essentialising-body-locating-medical-domination-and-resistance) (accessed 21 Jan 2013).  
41  
42  
43

44  
45 <sup>7</sup> Khan S. Systems of medicine and nationalist discourse in India: Towards “new horizons” in  
46 medical anthropology and history. *SocSci Med*. 2006;62: 2786-97.  
47

48  
49 <sup>8</sup> World Health Organization. WHO Traditional Medicine Strategy 2002 – 2005. WHO,2002.  
50

51  
52 <sup>9</sup> Lohokare M, Davar BV. The Community Role of Indigenous Healers. In: Sheikh K, George A  
53 (eds.) *Health Providers in India: On the Frontlines of Change*. New Delhi: Routledge; 2011. p161–81.  
54

55  
56 19 of 21  
57  
58  
59  
60

1  
2  
3  
4 Experiences and meanings of integration  
5  
6  
7

---

8  
9 <sup>10</sup> Department of Health and Family Welfare. *Mainstreaming AYUSH under NRHM*.

11 <http://203.193.146.66/hfw/PDF/ayus.pdf> (accessed 31 Mar 2011).

12  
13 <sup>14</sup> Department of AYUSH. *AYUSH under NRHM*.

15 <http://indianmedicine.nic.in/writereaddata/linkimages/4468616884->

16 [AYUSH%20under%20NRHM.pdf](http://indianmedicine.nic.in/writereaddata/linkimages/4468616884-AYUSH%20under%20NRHM.pdf) (accessed 5 Sep 2013).

17  
18  
19  
20 <sup>21</sup> Unnikrishnan PM, Kumar LHP, Shankar D. Traditional Orthopaedic Practitioners' Place in  
22 Contemporary India: A Case Study from Southern India. In: Sheikh K, George A (eds.) *Health*  
23 *Providers in India: On the Frontlines of Change*. New Delhi: Routledge; 2011. p182–99.

24  
25  
26 <sup>27</sup> Lakshmi JK. Less equal than others? Experiences of AYUSH medical officers in primary  
28 health centres in Andhra Pradesh. *Indian J Med Ethics* 2012;9:18–21.

29  
30  
31 <sup>32</sup> Priya R, Shweta AS. *Status and Role of AYUSH and Local Health Traditions: Under the National*  
33 *Rural Health Mission, Report of a Study*. National Health Systems Resource Centre. 2010.

34  
35  
36 <sup>37</sup> Barrett S, Fudge C. *Policy and action: essays on the implementation of public policy*. London: Methuen;  
38 1981.

39  
40  
41 <sup>42</sup> Walt G, Gilson L. Reforming the health sector in developing countries: the central role of  
43 policy analysis. *Health Policy Plan* 1994;9:353–70.

44  
45 <sup>46</sup> Yanow D. *Conducting Interpretive Policy Analysis*. Newbury Park,CA: Sage; 2000.

46  
47  
48 <sup>49</sup> Ritchie J, Spencer L. Qualitative Data Analysis for Applied Policy Research. In *Analyzing*  
50 *qualitative data*. London: Routledge;1994. p173-94.

51  
52  
53  
54  
55  
56 20 of 21  
57  
58  
59  
60



1  
2  
3  
4 Experiences and meanings of integration  
5  
6  
7

---

8  
9 <sup>19</sup> Hollenberg D. Uncharted ground: Patterns of professional interaction among  
10 complementary/alternative and biomedical practitioners in integrative health care settings. *Soc Sci*  
11 *Med* 2006;62:731-44.  
12

13  
14 <sup>20</sup> Broom A, Doron A, Tovey P. The inequalities of medical pluralism: Hierarchies of health, the  
15 politics of tradition and the economies of care in Indian oncology. *Soc Sci Med* 2009;69:698-706.  
16  
17

18  
19 <sup>21</sup> Chung VC, Hillier S, Lau CH, Wong S, Yeoh EK, Griffiths SM. Referral to and attitude  
20 towards traditional Chinese medicine amongst western medical doctors in postcolonial Hong  
21 Kong. *Soc Sci Med* 2011;72:247-55.  
22  
23

24  
25 <sup>22</sup> Wangchuk P, Wangchuk D, Aagaard-Hansen J. Traditional Bhutanese medicine (gSo-BA Rig-  
26 PA): an integrated part of the formal health care services. *Southeast Asian J Trop Med Public Health*  
27 2007;38:161-7.  
28  
29

30  
31 <sup>23</sup> Bloom H. *The Lucifer Principle. A Scientific Expedition into the Forces of History*. New York: The  
32 Atlantic Monthly Press;1995.  
33  
34

35  
36 <sup>24</sup> Northridge ME, Mack Jr R. Integrating ethnomedicine into public health. *Am J Public Health*  
37 2002;92:1561-61.  
38  
39

40  
41  
42  
43  
44  
45  
46  
47  
48  
49  
50  
51  
52  
53  
54  
55  
56 21 of 21  
57  
58  
59  
60



Figure 1. Location of states in India where fieldwork was conducted (New Delhi, Meghalaya (ML), and Kerala (KL))

251x279mm (300 x 300 DPI)
