# Supplementary material for: Experiences and meanings of integration of TCAM (Traditional, Complementary and Alternative Medical) providers in three Indian states: results from a cross-sectional, qualitative implementation research study
Source: HighWire-hosted journal article supplement (doi:10.1136/bmjopen-2014-005203), 2014-11-25
Supplement: bmjopen-2014-005203supp.pdf [file bmjopen-2014-005203supp.pdf]

### TOPIC GUIDE: KEY INFORMANTS

*(Policy elites, representatives of TCAM and allopathic associations, CBO representatives, representatives of technical organizations)*

1. Reasons for involving TCAM providers in essential health services (AYUSH and non-AYUSH)
2. Roles of TCAM providers in health services (AYUSH and non-AYUSH)
3. Existing policies and strategies for TCAM integration (AYUSH and non-AYUSH)
4. Status and extent of implementation of above policies and strategies
5. Obstacles to implementation at different levels
6. Social and cultural contexts and factors promoting and impeding integration
7. Position and role(s) of respective organization in promoting / facilitating / opposing TCAM integration

### TOPIC GUIDE: HEALTH SYSTEMS ACTORS

*(Public sector health planners, administrators)*

1. Personal designation and role within the organization/department
2. Role and functions of organization/department
3. Designated functions of the organization/department in involving TCAM providers in service delivery
4. Organizational arrangements for performing each of these functions
5. Experiences of executing each of these functions (probe: explanations)
6. Shortfalls and obstacles in executing each function (probe: explanations)
7. Interactions with other organizations / departments in process of involving TCAM
8. Reasons for involving TCAM providers in health care system (AYUSH and non-AYUSH)
9. Roles of TCAM providers in health care system (AYUSH and non-AYUSH)
10. How is people's health care access affected as a result of TCAM involvement?
11. How is the quality of care provided by TCAM providers affected by their involvement?
12. How is the development of TCAM systems of medicine affected by their involvement?
13. Perceptions about value and utility of TCAM systems of medicine (AYUSH and non-AYUSH)
14. Opportunities to strengthen role of organization/department in working with TCAM

### TOPIC GUIDE: TCAM

*(TCAM practitioners working in public sector health services)*

1. Your role in health care system (AYUSH and non-AYUSH)
2. Experiences of interface with administration (probe: explanations)
3. Experiences of interface with facility support staff (probe: explanations)
4. Experiences of interface with users of care and community (probe: explanations)
5. Experiences of working with allopathic providers
6. Experiences demonstrating benefits and advantages (probe: explanations)
7. Experiences demonstrating detriments and disadvantages (probe: explanations)
8. Experiences of interface with other TCAM providers [A,U,H and non-AYUSH] (probe: explanations)
9. How has the quality of care you provide been affected by involvement in health services?
10. How is the development of TCAM systems of medicine affected by involvement in health services?

### TOPIC GUIDE: ALLOPATHIC DOCTORS

*(Allopathic doctors working with TCAM practitioners)*

1. Reasons for involving TCAM providers in health care system (AYUSH and non-AYUSH)
2. Roles of TCAM providers in health care system (AYUSH and non-AYUSH)
3. Experiences of working with TCAM providers
4. Impact of involvement of TCAM providers on facility performance (probe: explanations)
5. Experiences demonstrating benefits and advantages (probe: explanations)
6. Experiences demonstrating detriments and disadvantages (probe: explanations)
7. How is people's health care access affected as a result of TCAM involvement?
8. How is the quality of care provided by TCAM providers affected by their involvement?
9. How is the development of TCAM systems of medicine affected by their involvement?
10. Perceptions about value and utility of TCAM systems of medicine (AYUSH and non-AYUSH)

### TOPIC GUIDE: COMMUNITY REPRESENTATIVES

*(CBO, Consumer, MBP, PRI representatives)*

1. Experience of receiving care from TCAM providers
2. Experience of receiving care from Allopathic providers
3. Experience of receiving care in co-located facilities following integration
4. How is utilization of health services affected as a result of TCAM involvement? Why?
5. Has there been any change in the quality of care in health facilities, following involvement of TCAM providers? How so?
6. Perceptions about value and utility of TCAM systems of medicine (AYUSH and non-
